# Supplementary material
Source: publisher figshare collection journal article supplement (https://acs.figshare.com/ndownloader/files/4104103)
Supplement: Supplementary file 1 [file 4104103]

## **Supporting information**

### **Biochemical-, Biophysical- and Microarray-Based Antifungal Evaluation of the Buffer-Mediated Synthesized nano Zinc Oxide: An in Vivo and in Vitro Toxicity Study**

Prasun Patra\*, Shouvik Mitra, Nitai Debnath, Arunava Goswami.

Biological Sciences Division, Indian Statistical Institute, 203 B.T. Road, Kolkata-700108, India.

\* bioprasun@gmail.com

Tel: +91-332575-3227, Fax: +91-332577-3049.

## **1. Materials and Methods**

### **1.1. Materials.**

Zinc acetate dihydrate  $[\text{Zn}(\text{OAc})_2 \cdot 2\text{H}_2\text{O}]$ , Tris(hydroxymethyl)aminomethane  $[(\text{HOCH}_2)_3\text{CNH}_2]$  (TRIS buffer), Ethanol, Glutaraldehyde were purchased from Merck (India); Potato Dextrose Agar (PDA) and Agar were purchased from Himedia (India). All the chemicals were of analytical grade and used without further purification. Milli-Q grade water (Sartorius Stedim biotech) was used throughout the experiment with conductivity less than  $0.1 \mu\text{S cm}^{-1}$ .

### **2. Physicochemical Characterization of ZNPs.**

Hydrodynamic radius and zeta potential of ZNPs was analyzed using dynamic light scattering (DLS) in Malvern Zetasizer. UV-VIS absorbance of ZNPs was measured in a Shimadzu (model no. 1760) UV-VIS spectrometer. Powder sample XRD of ZNPs was carried out in Bruker D8 instrument applying a primary beam monochromator to select the  $\text{K}\alpha 1$  component of the employed copper radiation (wavelength of  $1.54056 \text{ \AA}$ ). FTIR spectra were recorded in Perkin-Elmer Spectrum 100. Photoluminescence spectrum (PL) was recorded in Hitachi spectrofluorimeter (model no: F-7000). The topography of ZNPs was obtained by Atomic Force Microscope (AFM) of NTEGRA, NT-MDT (TS-150) in tapping mode. Morphology of the synthesized ZNPs was studied in SUPRA 40 Field Emission Scanning Electron Microscope (FESEM) of Carl Zeiss, operated at acceleration voltage of 5.0 kV; EDX analysis was carried out with the same instrument. Particle size of ZNPs was obtained from High Resolution Transmission Electron Microscope (HR-TEM) (FEI) at an operational voltage of 200 kV. Stability of the ZNPs with increase in temperature through a wide range was obtained from TG-DTA analysis carried out in Diamond TG/DTA pyris series with a heating rate of  $10^\circ\text{C}$  per minute under nitrogen atmosphere. Confocal microscopic image was acquired by using Nikon A1 confocal microscope at 540 nm excitation wave length. ICPMS analysis was carried out on Perkin Elmer ELAN DRC-e instrument.

## **3. Experimental**

### **3.1. Determination of ROS: superoxide dismutase, catalase, ascorbate peroxidase and glutathione reductase activity assay.**

Super oxide dismutase activity was measured by its ability to inhibit photochemical reduction of NBT at 560 nm following the method of Beauchamp *et al.*, 1971<sup>1</sup>. One enzyme unit of SOD was defined as that amount of protein (in mg) causing a 50% inhibition of photoreduction. Catalase activity was estimated according to Bergmeyer, 1970<sup>2</sup> which checked out the initial rate of disappearance of  $\text{H}_2\text{O}_2$

at 240 nm. Ascorbate peroxidase activity was measured following Nakano *et al.*, 1981<sup>3</sup> which depended on the decrease in absorbance at 290 nm as ascorbate was oxidized. Glutathione reductase enzyme activity was evaluated spectrophotometrically at 25°C<sup>4</sup>. One enzyme unit of glutathione reductase was defined as the oxidation of 1 mmol NADPH per min under the assay condition.

### **3.2. Total thiol (–SH) content assay.**

Total thiol content was determined by a modified method of Ellman, 1959<sup>5</sup>. Briefly 0.5 g of fungal mycelia (grown at different ZNPs concentrations along with control) for each sample was taken and ground using a cold mortar and pestle. Then 4mL of 50mM ice-cold phosphate buffer (pH 7.0) was added in each sample into the mortar and mixed well. The homogenate was centrifuged at 2000g for 20min at 4°C. 3 mL of the supernatant was mixed with 2 mL of phosphate buffer (pH7.0) and 5mL distilled water and they were mixed well to get 10 mL reaction mixture. 20 µL of 0.01M DTNB solution was added to 3mL of the reaction mixture, shaken well and absorbance was recorded at 412 nm. Thiol content was calculated using extinction coefficient 13, 600 M<sup>-1</sup> cm<sup>-1</sup> for DTNB at 412 nm.

### **3.3. Lipid peroxidation assay.**

Malondialdehyde (MDA) content, final product of lipid peroxidation was measured following the slightly modified method of Dhindsa *et al.*,1981<sup>6</sup>. Fungal extracts were prepared following the same method of extraction for thiol content assay. Then 0.5 mL supernatant of fungal extract was added to 1 mL of 20% (v/v) trichloroacetic acid and 0.5% (v/v) thiobarbituric acid. The mixture was heated in a water bath at 95°C for 30min followed by cooling at room temperature. After centrifugation at 10, 000g for 10min, the supernatant was used for absorbance measurements at 532 and 600 nm respectively. The absorbance for non specific absorption at 600nm was subtracted from the value at 532 nm. The amount of MDA was calculated using the adjusted absorbance and the extinction coefficient 155 mM<sup>-1</sup> cm<sup>-1</sup> <sup>7</sup>.

### **3.4. Proline assay.**

Proline assay was evaluated following the modified method of Chinard, 1952<sup>8</sup>. Control and ZNPs treated fresh mycelia were ground with an ice-cold mortar and pestle and extracted with 4 mL of 3 % sulfosalicylic acid. After homogenization and centrifugation at 2000 g for 20 min, 2 mL of the supernatants were pipetted out into a 10 mL screw capped glass test tube. 2 mL glacial acetic acid and 2mL acid-ninhydrin reagent were added to the supernatants. After heating to 100°C for 45 min these screw capped tubes were placed in an ice bath to cool to room temperature. Then 4 mL toluene was added to each tube and shaken vigorously for 2 min. Then samples were allowed to stay for 15 min for complete phase separation. Upper toluene layer was separated and kept in room temperature for 10

min and the red colour intensity was read at 520 nm against toluene blank. The proline concentration was determined from a standard curve and calculated on a fresh weight basis (mM proline/gFW).

### **3.5. Measurement of protein oxidation by DNPH assay.**

Protein carbonyl content was a marker of oxidative stress which was measured spectrophotometrically following slightly modified DNPH binding assay<sup>9</sup>. All fungal strains were cultured in control and ZNP treated PDB; then incubated at 28°C-30°C with vigorous shaking for 48 h to form mycelial balls. After 48 h of incubation mycelial balls were isolated from culture and washed with 50 mM phosphate buffer (pH 7.0). The sample balls were then freeze dried with liquid nitrogen and ground with an ice-cold mortar pestle using 8 mL of 50 mM phosphate buffer (pH 7.0). The homogenates were centrifuged at 5000 rpm for 20 minutes at 4°C. The supernatants were incubated with DNPH for 1 h at 37°C; proteins were precipitated in 10% cold TCA and washed with ethanol: ethyl acetate (1:1) to remove excess DNPH. Finally samples were dissolved in 6 (M) guanidine chloride (pH 2). The optical density was measured at 380 nm and the carbonyl content was calculated using a molar extinction coefficient of  $21 \text{ mM}^{-1} \text{ cm}^{-1}$ , resulting in final measurement in nanomoles of DNPH incorporated (protein carbonyls) per mg of protein.

### **3.6. Fungal protein content study by FTIR spectra.**

For FTIR analysis fungal strain (*A. niger*, MTCC -10180) was cultured as described in DNPH binding assay up to washing of mycelial ball with phosphate buffer (pH 6.8-7.0). Then mycelial balls were washed successively with deionized water and 40% ethanol. After that all the samples (both control and treated) were sonicated for 30 minutes to rupture the fungal cell wall. Finally FTIR data were taken from the liquid samples (2-3  $\mu\text{L}$ ) after successful air drying<sup>10</sup>.

### **3.7. Microarray analysis of ZNPs treated *A. niger*.**

Normalization (Percentile shift) was done using GeneSpring GX Version 11.5 using recommended Per Chip and Per Gene Normalization. Percentile shift normalization is a global normalization, where the locations of all the spot intensities in an array are adjusted. This normalization took each column in an experiment independently, and computed the percentile of the expression values for this array, across all spots (where n has a range from 0-100 and n=50 is the median). It subtracted this value from the expression value of each entity.

### **3.8. Detection of Protein Carbonylation by Westernblotting.**

Control and treated fungal samples were ground in a chilled mortar (0.5 g fresh weight  $\text{mL}^{-1}$ ) in protein extraction buffer (PEB) containing 100 mM Tris-HCL, pH 8.0, 2 % (v/v) 2 mercaptoethanol, 5 mM

EGTA, 1 mM EDTA, 1 mM AEBSF, 10 g ml<sup>-1</sup> leupeptin, 1 mM *p*-amino-benzamidine, 5 mM 6-amino-hexanoic acid, 2 μM E64, 10 μM NaF, 1 mM DPTA and 1 mM BHT. Fungal soluble protein extracts were mixed with two volumes of 10mM DNPH in 2 M HCl at room temperature for 30 minutes with gentle agitation. A control sample was mixed with two volumes of 2M HCl, five volumes of ice-cold phenol (Tris-buffered, pH 7.9) was added to each tube respectively. After vortexing for 1 min, the mixture was centrifuged for 10 min at 10,000g. The upper phase was removed and discarded leaving the interface intact and the phenol phase was re extracted twice with ice-cold Tris-HCl buffer (50 mM, pH 8.0). Five volumes of cold 0.1 M ammonium acetate in methanol was added to the lower phase and incubated at -20°C overnight. In the following day, resulting pellets were washed three times with 1 ml 0.1 M ammonium acetate in methanol and once with 1 ml cold ethanol. To each pellet, IEF buffer [containing 7 M urea, 2 M thiourea, 4% v/v CHAPS, 65 mM DTT, 20 μl 0.1% bromophenol and 20μl IPG buffer, pH 4-7] was added. The samples were incubated for 2 h at room temperature. Insoluble material was removed by centrifugation at 10000 g for 20 min at 4°C and the supernatant was transferred in to a fresh tube for gel electrophoresis<sup>11</sup>. SDS-PAGE was performed with 12% gels with a loading of 10μg protein samples in each lane. Resolved proteins were electrophoretically transferred to Immobilon-P (PVDF, Millipore) membranes and oxidized proteins were detected by using anti DNP antibodies [Oxiblot Protein detection kit (Millipore)]

### **3.9. Bioavailability/ uptake study of ZNPs.**

#### **3.9.1. SEM, HR-TEM and Confocal microscopic analysis.**

For Scanning Electron Microscopic (SEM) and High Resolution Transmission Electron Microscopic (HR-TEM) the fungal samples (*A. niger*, MTCC-10180) were cultured in PDA medium and after 48 h of inoculation, fungal cultures (*A. niger*, MTCC-10180) were isolated and washed with deionized water several times and fixed with 2% glutaraldehyde solution at 4°C for 2 hrs followed by post fixing of specimen for 2 h with 1% osmium tetroxide solution, the samples were dehydrated with graded ethanol<sup>12</sup>. This sample was directly used for SEM and EDX analysis, gold and carbon coating was avoided. For HR-TEM dehydrated samples were sectioned using cryotome and then subjected to a carbon coated copper grid.

For confocal ZNPs were converted into its fluorescent counterpart by conjugation of rhodamine-B-isothiocyanate (RITC). Synthesis of RITC tagged ZNPs was described in paragraph below. *A. niger* cultured in potato dextrose broth (PDB) was incubated with 500 ppm of RITC tagged ZNPs for 72h and fungal samples were isolated and prepared using standard protocol as mentioned above<sup>12</sup>. Finally the samples were fixed with glue (Tissue-Tek, Sakura) and observed under confocal microscope.

### **3.9.2. Synthesis of RITC tagged ZNPs.**

RITC tagged ZNPs were synthesized in two steps, first one involved the conversion of ZNPs into amine functionalized ZNPs while the second step involved conjugation of RITC to amine functionalized ZNPs.

#### **(a) Synthesis of amine functionalized ZNPs.**

Amine functionalization of ZNPs was carried out by using 3-aminopropyltriethoxysilane (APTES) via co-condensation reaction using our previously reported method<sup>13</sup>. In brief, about 0.5 g of ZNPs were dispersed in about 50 mL of DMSO in a sonication bath for about 1 hour. The resultant dispersion was transferred to a round bottom flask attached with a reflux condenser. To it 400  $\mu$ L of APTES was added and the solution was refluxed at 120°C for about 3 hours. After completion of the reaction the resulting nanoparticle was centrifuged at 12000 rpm for about 15 minutes and washed several times with ethanol to remove the unreacted APTES. Finally the product was dried at 60°C for overnight to produce amine functionalized ZnO nanorod.

#### **(b) Conjugation of RITC to amine functionalized ZNPs.**

ZNPs of appropriate concentration were dispersed in 0.1 M NaHCO<sub>3</sub> solution, to it 1 mg of RITC dissolved in 2 mL of aqueous DMSO (1:1, v/v) was added instantly and the reaction mixture was stirred at room temperature for 24 h in a dark condition. RITC labelled ZNPs (ZNPs-RITC) were separated by centrifugation at 10000 rpm at 4 °C. ZNPs-RITC were washed and redispersed in water repeatedly to remove excess of RITC.

### **3.10. Toxicity study of ZNPs using mice model.**

#### **3.10.1. Treatment of mice.**

The healthy swiss albino mice, weight about 20–22 g (8-weeks old) were placed in clean polypropylene cages with access to food and water. These cages were maintained in an air-conditioned animal house at 20  $\pm$  28°C, 50–70% relative humidity and 12 h light/dark cycle. The animals were provided with commercial rat pellet diet and deionized water. After one week acclimation, the mice were randomly divided into 4 groups, each group consisted of five female and five male mice. Short term toxicity (acute oral toxicity) and long term toxicity (through intravenous injection) study was carried out separately.

#### **3.10.2. Acute oral toxicity study.**

Mice were placed separately in polypropylene cages. 0.5, 1.0, 2.0 g/kg body weight were selected doses for ZNPs treatment. The ZNPs were suspended in deionized water and dispersed by ultrasonic vibration for 15 min with before treatment. 1mL of each ZNPs suspension was fed orally. Two weeks later, the animals were sacrificed and the blood was obtained from ophthalmic veins. The brain, heart, lung, liver, spleen, stomach, kidneys, testis or uterus were collected<sup>14</sup>.

### **3.10.3. Long term toxicity study through intravenous injection.**

Long term toxicity study was carried out using three different doses of ZNPs and MZnO (100 µg/mL, 250 µg/mL and 500 µg/mL). Mice were injected intravenously through tail vein with 100 µL of each doses of ZNPs and MZnO once in a week for two months time span. After two months mice were sacrificed and blood and major organs were collected separately for biochemical and histopathological analysis.

### **3.10.2. Biochemical assay of serum and Blood-element test.**

The serum was obtained by centrifugation of whole blood at 3000 rpm for 15 min. The serum biochemical levels including lactate dehydrogenase, creatinine, alkaline phosphatase, total protein, total cholesterol, tri-glyceride, uric acid, Bun, S.G.O.T, S.G.P.T and phosphorus were examined<sup>14</sup>.

The 0.1 mL of 15 g/L EDTA-Na was pre-added into 1 mL of blood sample and the anticoagulant blood sample was immediately used for the blood element test within 2 h. The blood-elements, including TC (Red blood cell, White blood cell) and DC in % (Neutrophils, lymphocytes, monocytes, eosinophils, basophils) and blood platelets were assayed. The data were expressed as mean ± standard deviation.

### **3.10.4. Histopathological study.**

A small piece of brain, heart, lung, liver, spleen, stomach, kidneys, testis and uterus were fixed by 10% formalin and then embedded into paraffin, sectioned for 5–6-mm thick, and mounted on the glass microscope slides using standard histopathological techniques. The sections were stained with hematoxylin-eosin and examined by light microscopy [Carl Zeiss]<sup>14</sup>.

### **3.10.5. *In vivo* Haemolysis measurement.**

For *in vivo* blood toxicity determination healthy young, non pregnant 8-weeks old healthy swiss albino mice about 20–22 g body weight was intravenously injected with 100µL of ZNPs and MZnO (500 µg/mL) through tail vein and the resultant blood was collected after 1hr of injection with respect to a control set. Erythrocyte enriched fraction was centrifuged twice (3,000 rpm, 15 min) at 4°C to

remove the residual plasma and buffy coat. RBCs were washed 3 times with phosphate buffer saline (PBS) (pH 7.4) and resuspended in same buffer to make packed cell volume of ~10% (w/v) as stock. Then haemolysis was carried out by mixing 690 $\mu$ L of the above RBC stock suspension making a total volume 1.5 mL by addition of PBS to maintain 5.5% cell volume for each and every set of experiment. Afterward, the erythrocyte cells were centrifuged (3,000 rpm, 15 min) at 4°C and washed thrice with PBS. Finally haemolysis was monitored UV-VIS spectrophotometrically at 540 nm<sup>15</sup>.

### **3.11. Acetylcholine esterase assay of mice brain.**

6-8 weeks old healthy swiss albino female mice (five for each treatment) were selected for this assay. 1 mL of ethanolic solution in ZNPs (2g/kg of body weight) along with an ethanolic control was fed orally to mice for 3 days after 7-10 days of acclimatization. Within 24 h of treatment, frontal cortex, hippocampus and septum of brain were quickly dissected out on a petridish chilled on crushed ice. Then 0.5 g of tissues were weighed and homogenized in 0.1M Phosphate buffer (pH 8). 0.4 mL aliquot of the homogenate was added to a cuvette containing 2.6 mL phosphate buffer (0.1M, pH 8) and 100 $\mu$ L of dithiobis 2 nitro-benzoic acid (DTNB) solution (39.6 mg in 10mL of 0.1 M phosphate buffer with 15 mg of NaHCO<sub>3</sub>). 20  $\mu$ L of 75 mM acetylthiocholine iodide was added and change in absorbance was recorded for a period of 10 minutes at intervals of 2 minutes. Change in the absorbance per minute was thus determined at 412 nm. The enzyme activity was calculated using the following formula;  $R = 5.74 \times 10 \times A/CO$  where, R = Rate in moles of substrate hydrolyzed /minute / gm tissue; A = Change in absorbance / min; CO = Original concentration of the tissue (mg / mL)<sup>16</sup>.

### **3.12. Fertility study of mice.**

This study was performed in highest dose of *in vivo* toxicity study *i.e.* 2g/kg to parental (F<sub>0</sub> generation) male and female mice. Five pairs of healthy swiss albino mice with uniform weight and age were used for both generations. The females were not pregnant and nulliparous. Animals were assigned to control and treated groups in a random manner to minimize bias. All treated and control animals were acclimated to the study conditions five days before treatment begins. Animals were exposed to the test substance through oral route during the entire study period.

For each mating, a female was placed with a randomly selected single male till the pregnancy occurs and throughout their whole gestational period. Near parturition, pregnant females were caged separately. One male and one female were randomly selected from each litter for mating with another pup of the same group to produce the next generation. The mating procedures for the F<sub>1</sub> males and females were carried out in the same manner as the F<sub>0</sub> parental animals. Each litter was examined as soon as possible after delivery for the number of pups, health of pups. The neonates were carefully observed on postnatal days 0 (day of birth), 4, 7, 14 and 21<sup>17</sup>.



### 3.13. *In vitro* cytotoxicity study using MRC5 cell line.

Viability of MRC-5 cells after ZNPs and MZnO treatment was assessed in triplicate by WST-1 assay with proper controls. Briefly 10  $\mu$ L of reconstituted WST-1 mixture (WST-1 assay kit: BioVision - K302-500) was added to each well of a 96-well plate. The cells were incubated for 4 h at 37°C in a CO<sub>2</sub> incubator. Before reading the absorbance, the plates were kept on an orbital shaker for 1 min for gentle, homogeneous mixing of the colour. The absorbances of the treated and untreated cells were measured using a microtiter plate reader at 450 nm<sup>18</sup>.

The extent of cytotoxicity of ZNPs and MZnO on MRC-5 cells was estimated in triplicate in 96-well plate by measurement of LDH released from damaged cells into the medium (LDH assay kit: Cayman chemical - 1008882). In brief, cell culture plates were centrifuged at 400 X g for 5 minutes. 100  $\mu$ L of supernatant from each well of treated and control cells were transferred to corresponding wells in a new 96-well plate. 100  $\mu$ L of reconstituted reaction mixture was added to each well using multi channel pipetman. The plate was incubated at room temperature with gentle shaking on an orbital shaker for 30 minutes. The absorbance was taken at 490 nm in a microtiter plate reader. In WST and LDH assay data were expressed as percentage of cells alive and percentage of cytotoxicity respectively in control and treated wells<sup>18</sup>.

### References

1. Beauchamp, C.O.; Fridovich, I. Superoxide dismutase: improved assays and an assay applicable to acrylamide gels. *Anal. Biochem.* **1971**, 44, 276-287.
2. Bergmeyer, N. Methoden der enzymatischen Analyse, vol. 1. Akademie Verlag, Berlin, **1970**, 636-647.
3. Nakano, Y.; Asada, K. Hydrogen peroxide is scavenged by ascorbate-specific peroxidase in spinach chloroplasts. *Plant Cell Physiol.* **1981**, 22,867-880.
4. Foyer, C. H.; Halliwell, B. The presence of glutathione and glutathione reductase in chloroplasts: a proposed role in ascorbic acid metabolism. *Planta.* **1976**, 133,21-25.
5. Ellman, G.,L. Tissue sulfhydryl groups. *Arch. Biochem. Biophys.* **1959**, 82,70-77.
6. Dhindsa, R.S.; Plumb-Dhindsa, P.; Thorpe, T.A. Leaf senescence: correlated with increased levels of membrane permeability and lipid peroxidation, and decreased levels of superoxide dismutase and catalase. *J. Exp. Bot.* **1981**, 32, 93-101.
7. Heath, R. L.; Packer, L. Photoperoxidation in isolated chloroplasts. I. Kinetics and stoichiometry of fatty acid peroxidation. *Arch. Biochem. Biophys.* **1968**, 125,189-198.

8. Chinard, F.P. Photometric estimation of proline and ornithine. *J. Biol. Chem.* **1952**, 199, 91–95.
9. Krumova, E.Z.; Pashova, S. B.; Dolashka-Angelova, P.A.; Stefanova, T.; Angelova, M. B. Biomarkers of oxidative stress in the fungal strain *Humicola lutea* under copper exposure. *Process Biochem.* **2009**, 44, 288-295.
10. Moore, G.S.; Atkins, R.D. The fungicidal and fungistatic effects of an aqueous garlic extract on medically important yeast-like fungi. *Mycologia.* **1977**, 69, 341-348.
11. Qiu, Q. S.; Huber, J. L.; Booker, F. L.; Jain, V.; Leakey, A. D. B.; Fiscus, E. L.; Yau, P. M.; Ort, D. R.; Huber, S. C. Increased protein carbonylation in leaves of Arabidopsis and soybean in response to elevated [CO<sub>2</sub>]. *Photosynth. Res.* **2008**, 97, 155-166.
12. Nishiyama, Y.; Hasumi, Y.; Ueda, K.; Uchida, K.; Yamaguchi, H. Effects of micafungin on the morphology of *Aspergillus fumigates*. *J. electron microsc.* **2005**, 54, 67-77.
13. Mitra, S.; Chandra, S.; Laha, D.; Patra, P.; Debnath, N.; Pramanik, A.; Pramanik, P.; Goswami, A. Unique chemical grafting of carbon nanoparticle on fabricated ZnO nanorod: Antibacterial and bioimaging property. *Mater. Res. Bull.* **2012**, 47, 586-594.
14. Wang, B.; Feng, W.; Wang, M.; Wang, T.; Gu, Y.; Zhu, M.; Ouyang, H.; Shi, J.; Zhang, F.; Zhao, Y.; Chai, Z.; Wang, H.; Wang, J. Acute toxicological impact of nano- and submicro-scaled zinc oxide powder on healthy adult mice. *J. Nanopart. Res.* **2008**, 10, 263–276.
15. Mitra, S.; B., Subia; Patra, P.; Chandra, S.; Debnath, N.; Das, S.; Banerjee, R.; Kundu, S. C.; Pramanik, P.; Goswami, A. Porous ZnO nanorod for targeted delivery of doxorubicin: in vitro and in vivo response for therapeutic applications. *J. Mater. Chem.* **2012**, DOI: 10.1039/c2jm35013k.
16. Raju, T.R.; Kutty, B.M.; Sathyaprabha, T.N.; Rao, BSS. (eds.) National Institute of mental Health and Neuro Sciences, Bangalore, India, **2004**, 142-144.
17. Riaz, A.; Khan, R.A.; Ahmed, S.; Afroz, S. Assessment of acute toxicity and reproductive capability of a herbal combination. *Pak.J. pharm. Sci.* **2010**, 23, 291-294.
18. Debnath, N.; Das, S.; Goswami, A. Novel Entomotoxic Nanocides for Agro-chemical Industry. 11th IEEE International Conference on Nanotechnology, **2011**, DOI: 10.1109/NANO.2011.6144360.

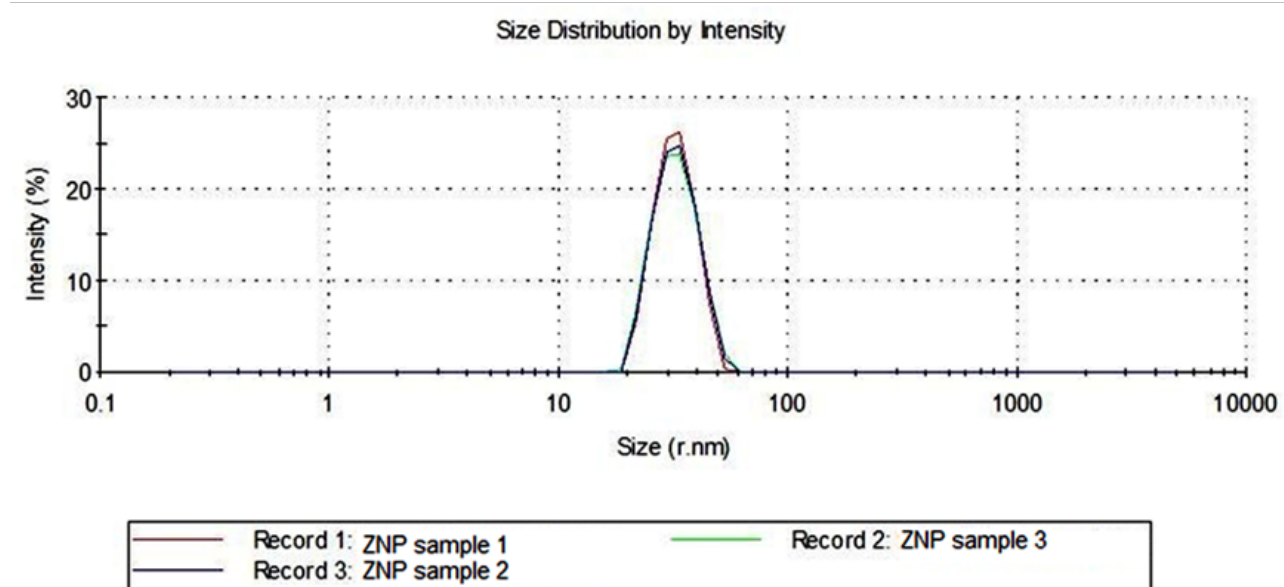

**Supporting Figure S1.** Measurements of hydrodynamic radius of ZNPs by using DLS.

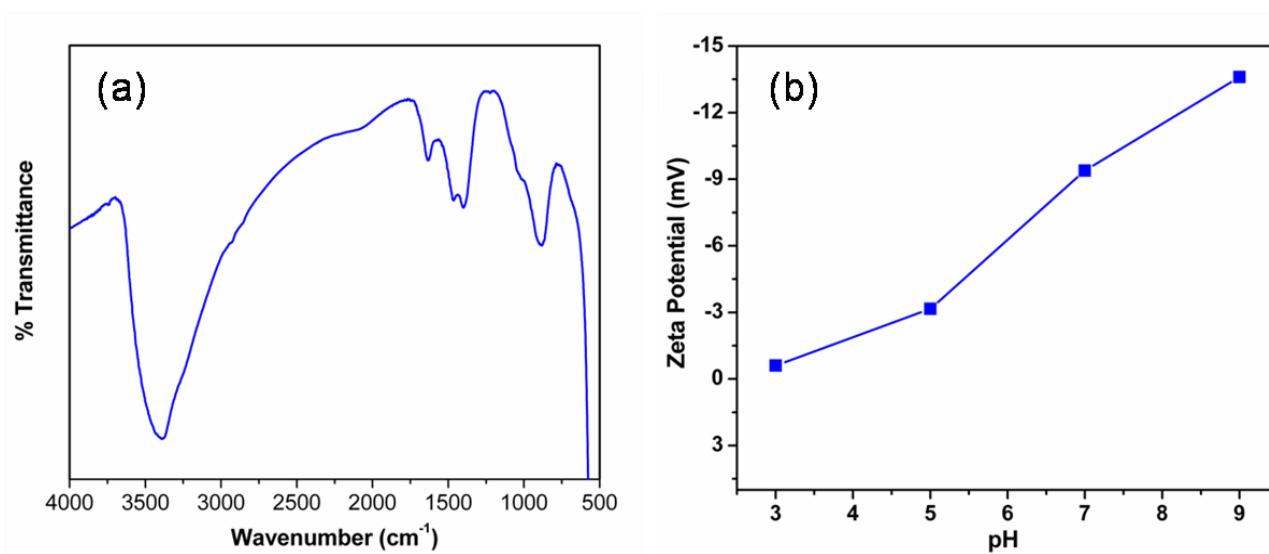

**Supporting Figure S2.** (a) FTIR spectra of ZNPs; (b) Measurement of zeta potential of ZNPs as a function of pH.

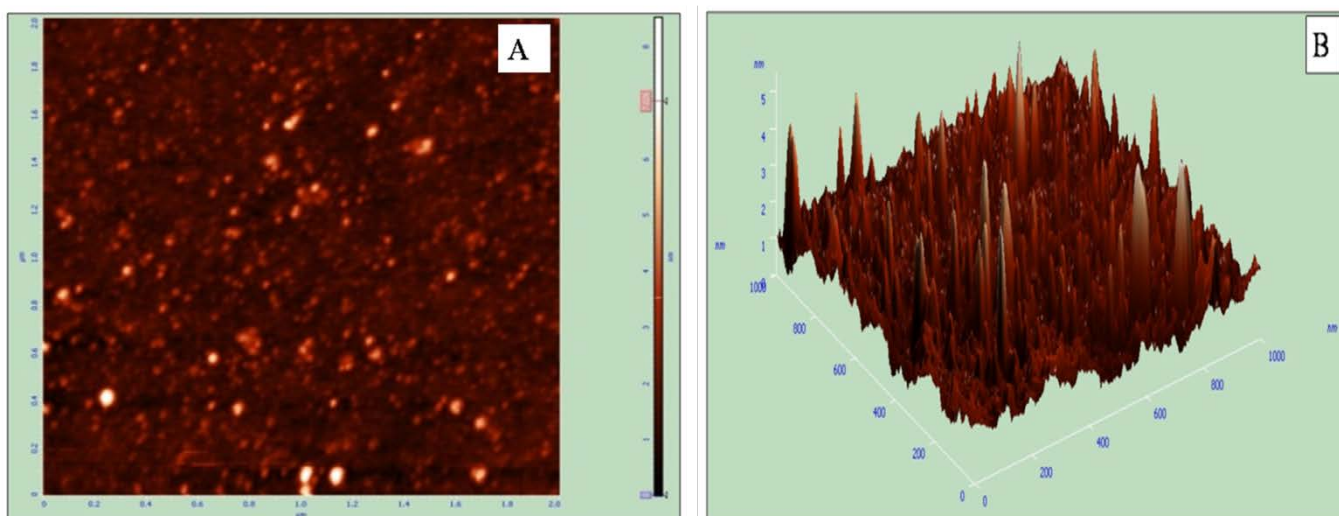

**Supporting Figure S3.** Topological attributes of ZNPs as determined from AFM studies (a)1D and (b) 3D view.

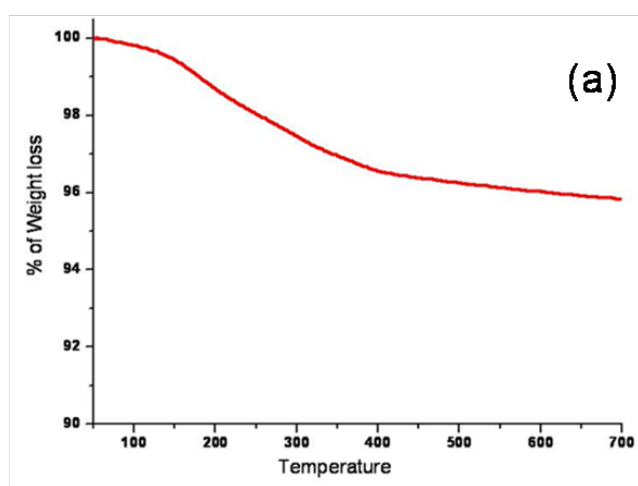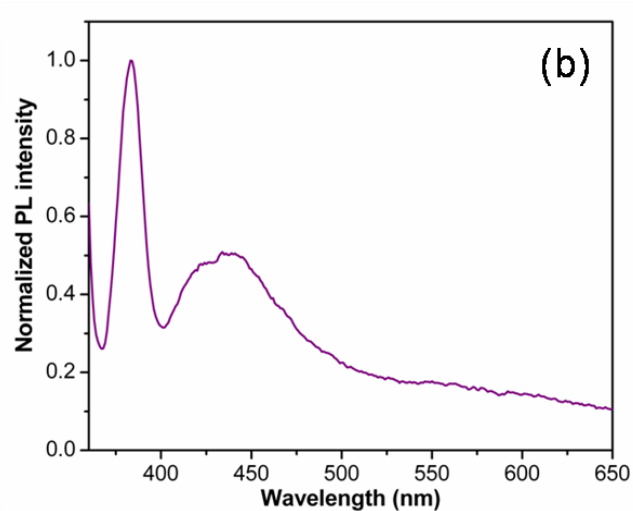

**Supporting Figure S4.** (a) Thermal decomposition patterns of ZNPs using thermogravimetric analysis (TG), (b) PL spectral analysis of ZNPs.

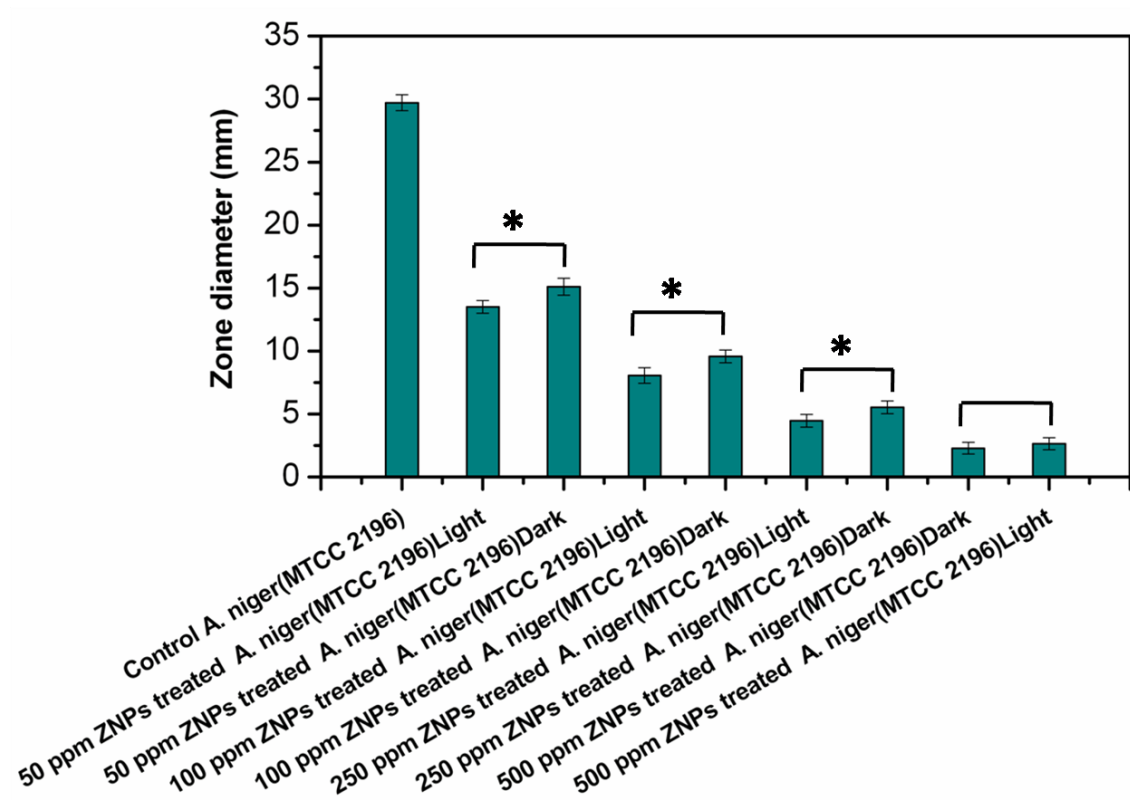

**Supporting Figure S5.** Light and dark dependent antifungal effect of microwave synthesized ZNPs. ZNPs exhibited more fungitoxic effect under light condition in comparison with dark condition, except 500 ppm dosage [\* denoted significant difference,  $P < 0.05$ ].

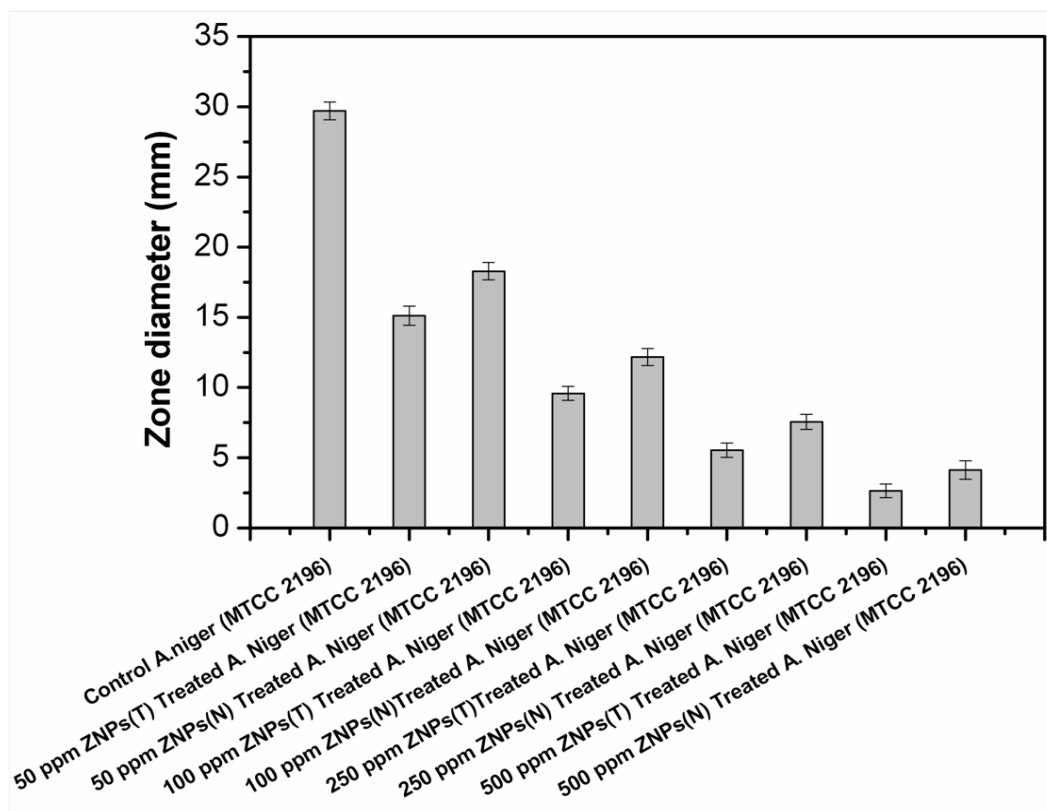

**Supporting Figure S6.** A comparison of antifungal activity between microwave synthesized ZNPs [ZNP (T)] and ZNPs synthesized by conventional chemical method [ZNP (N)]. Interestingly it was noted that microwave synthesized ZNPs exhibited greater antifungal effect in contrast to ZNPs synthesized by conventional chemical method. [ $F=12502$ ;  $P < 0.001$ ].



**Table 1.** Number of germination spores among *A.niger* (MTCC 10180 and MTCC 2196) and *F. oxysporum* (NCIM 1043 and NCIM 1072) strains as obtained from slide bioassay.

| Fungal Strains: No. of applied spores (spores/mL)        | Concentration of M ZnO and ZNPs | No of germination spores |                      |
|----------------------------------------------------------|---------------------------------|--------------------------|----------------------|
|                                                          |                                 | M ZnO(spores/mL)         | ZNPs(spores/mL)      |
| <i>A. niger</i> (MTCC-10180):<br>58 x 10 <sup>4</sup>    | 50 ppm                          | 27 x 10 <sup>4</sup>     | 15 x 10 <sup>4</sup> |
|                                                          | 100 ppm                         | 25 x 10 <sup>4</sup>     | 7 x 10 <sup>4</sup>  |
|                                                          | 250 ppm                         | 23 x 10 <sup>4</sup>     | 3 x 10 <sup>4</sup>  |
|                                                          | 500 ppm                         | 14 x 10 <sup>4</sup>     | No spores found      |
| <i>A. niger</i> (MTCC-2196):<br>62 x 10 <sup>4</sup>     | 50 ppm                          | 32 x 10 <sup>4</sup>     | 20 x 10 <sup>4</sup> |
|                                                          | 100 ppm                         | 27 x 10 <sup>4</sup>     | 12 x 10 <sup>4</sup> |
|                                                          | 250 ppm                         | 24 x 10 <sup>4</sup>     | 3 x 10 <sup>4</sup>  |
|                                                          | 500 ppm                         | 13 x 10 <sup>4</sup>     | No spores found      |
| <i>F. oxysporum</i> (NCIM-1043):<br>67 x 10 <sup>4</sup> | 50 ppm                          | 34 x 10 <sup>4</sup>     | 18 x 10 <sup>4</sup> |
|                                                          | 100 ppm                         | 29 x 10 <sup>4</sup>     | 11 x 10 <sup>4</sup> |
|                                                          | 250 ppm                         | 24 x 10 <sup>4</sup>     | 4 x 10 <sup>4</sup>  |
|                                                          | 500 ppm                         | 17 x 10 <sup>4</sup>     | No spores found      |
| <i>F. oxysporum</i> (NCIM-1072):<br>65 x 10 <sup>4</sup> | 50 ppm                          | 35 x 10 <sup>4</sup>     | 20 x 10 <sup>4</sup> |
|                                                          | 100 ppm                         | 29 x 10 <sup>4</sup>     | 13 x 10 <sup>4</sup> |
|                                                          | 250 ppm                         | 25 x 10 <sup>4</sup>     | 4 x 10 <sup>4</sup>  |
|                                                          | 500 ppm                         | 16 x 10 <sup>4</sup>     | No spores found      |

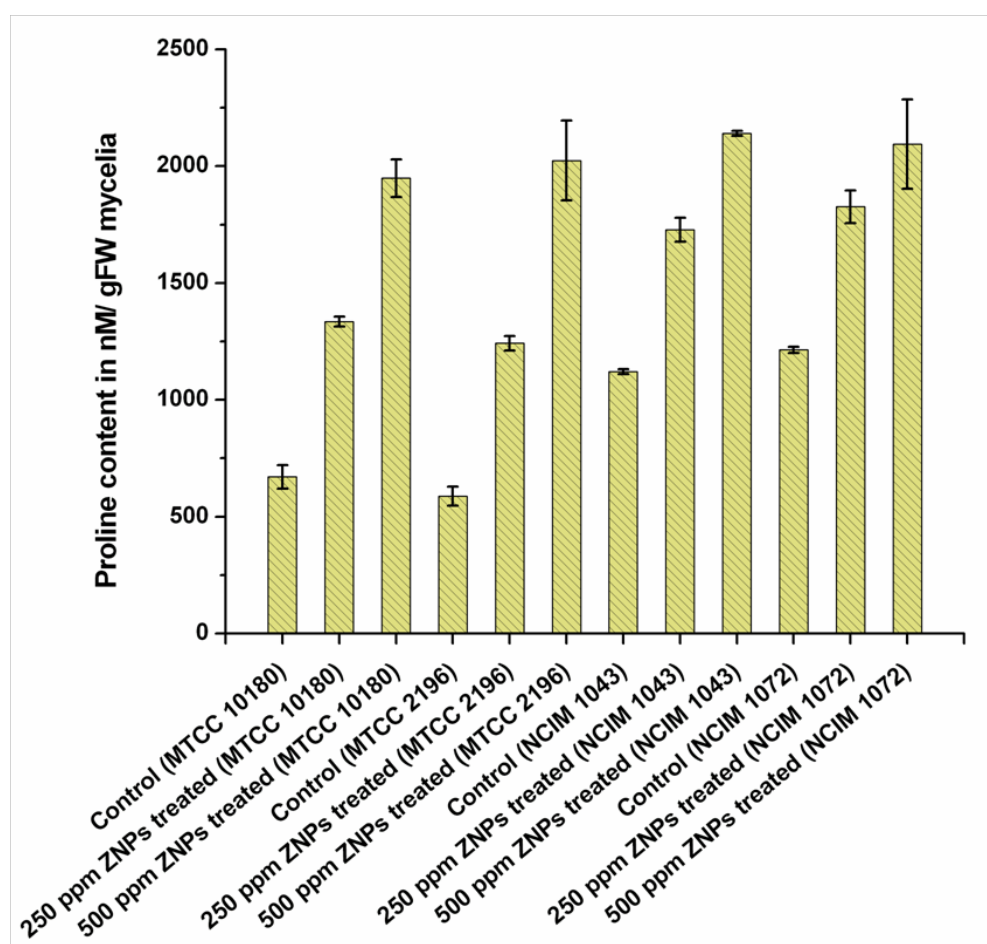

**Supporting Figure S7.** Change in proline content in fungal strains (*A.niger* and *F. oxysporum*) treated with different ZNPs concentrations (250 ppm and 500 ppm).

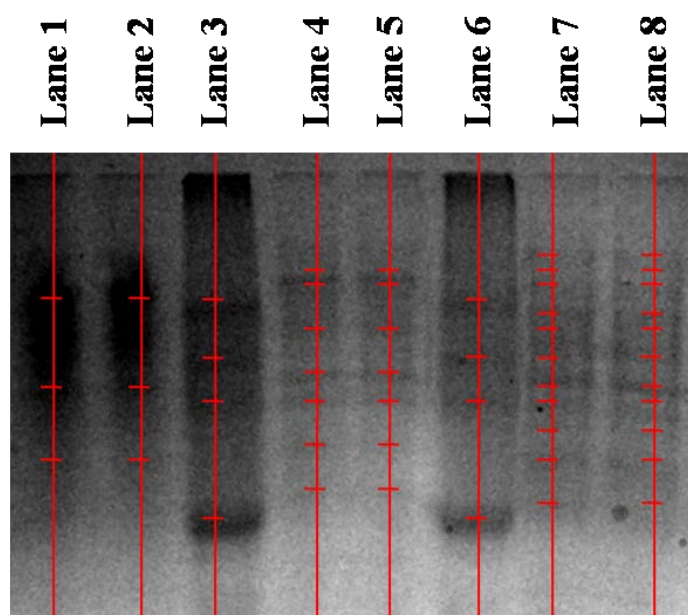

**Supporting Figure S8.** SDS PAGE gel electrophoresis of control and ZNPs treated samples of *A. niger*.

Increase of protein carbonylation (marker of oxidative stress) was shown in Lane 4 and 5 (250 ppm ZNPs treated *A. niger* sample) and Lane 7 and 8 (250 ppm ZNPs treated *A. niger* sample) with respect to control (Lane 1 and 2). Lane 3 and 6 denoted molecular marker (Protein marker, BLM003, 14-95 kDa, SRL).

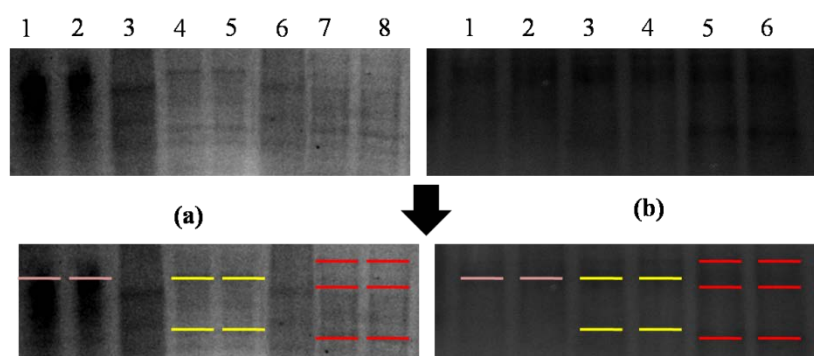

**Supporting Figure S9.** Western blot analysis of control and ZNPs treated samples of *A. niger*.

Immuno blot analysis of control and ZNPs treated (250 ppm and 500 ppm) *A. niger* samples with oxyblot detection kit (Millipore). Figure S9 (a) showed SDS PAGE of protein carbonylation ( Lane 1,2 denoted control, Lane 3, 6 denoted molecular marker, Lane 4, 5 denoted 250 ppm ZNPs treated *A. niger* sample and Lane 7, 8 denoted 500 ppm ZNPs treated *A. niger* samples). Figure S9 (b) showed corresponding western blot analysis of corresponding protein where Lane 1,2 denoted control, Lane 3, 4 denoted 250 ppm ZNPs treated *A. niger* sample and Lane 5, 6 denoted 500 ppm ZNPs treated *A. niger* samples.

**Gene wise microarray analysis of MZnO and ZNPs treated *A. niger* compared to control related to oxidative stress of different pathways.**

**1. Alanine and aspartate activity.**

| Gene ID            | Expression ratio<br>(MZnO) | Expression ratio<br>(NZnO) | Presumed function                 |
|--------------------|----------------------------|----------------------------|-----------------------------------|
| AN_specific_010786 | 1.694                      | 2.101                      | Alanine and<br>aspartate activity |
| AN_specific_009570 | 1.363                      | 1.879                      |                                   |
| AN_specific_005964 | 1.283                      | 1.509                      |                                   |
| AN_specific_002008 | 1.225                      | 0.968                      |                                   |
| AN_specific_007073 | 1.219                      | 1.630                      |                                   |
| AN_specific_003009 | 1.036                      | 1.781                      |                                   |
| AN_specific_008036 | 1.026                      | 0.902                      |                                   |
| AN_specific_001812 | 1.024                      | 2.304                      |                                   |
| AN_specific_001664 | 0.673                      | 1.412                      |                                   |
| AN_specific_009633 | 0.797                      | 1.005                      |                                   |

## 2. Amino acid biosynthesis.

| Gene ID            | Expression ratio<br>(MZnO) | Expression ratio<br>(NZnO) | Presumed function          |
|--------------------|----------------------------|----------------------------|----------------------------|
| AN_specific_004737 | 3.829                      | 4.275                      | Amino acid<br>Biosynthesis |
| AN_specific_005433 | 3.239                      | 4.110                      |                            |
| AN_specific_005064 | 2.310                      | 3.085                      |                            |
| AN_specific_003878 | 1.212                      | 0.838                      |                            |
| AN_specific_005172 | 1.088                      | 1.305                      |                            |
| AN_specific_010296 | 0.382                      | 0.253                      |                            |
| AN_specific_005319 | 2.477                      | 2.804                      |                            |
| AN_specific_007785 | 0.959                      | 2.137                      |                            |
| AN_specific_010482 | 0.771                      | 1.543                      |                            |
| AN_specific_000339 | 0.351                      | 1.302                      |                            |
| AN_specific_003569 | 0.755                      | 1.284                      |                            |
| AN_specific_010397 | 0.423                      | 1.026                      |                            |

### 3. Amino acid metabolism.

| Gene ID            | Expression ratio<br>(MZnO) | Expression ratio<br>(NZnO) | Presumed function        |
|--------------------|----------------------------|----------------------------|--------------------------|
| AN_specific_007897 | 3.107                      | 0.779                      | Amino acid<br>metabolism |
| AN_specific_002717 | 2.457                      | 2.817                      |                          |
| AN_specific_008950 | 2.400                      | 3.630                      |                          |
| AN_specific_001565 | 2.254                      | 3.158                      |                          |
| AN_specific_009807 | 1.574                      | 2.998                      |                          |
| AN_specific_009992 | 1.450                      | 1.305                      |                          |
| AN_specific_009373 | 1.247                      | 1.812                      |                          |
| AN_specific_008145 | 1.236                      | 1.111                      |                          |
| AN_specific_005172 | 1.088                      | 1.305                      |                          |
| AN_specific_002624 | 1.051                      | 1.523                      |                          |
| AN_specific_003009 | 1.036                      | 1.781                      |                          |
| AN_specific_001812 | 1.024                      | 2.304                      |                          |
| AN_specific_005484 | 1.004                      | 0.433                      |                          |
| AN_specific_010690 | 3.500                      | 4.068                      |                          |
| AN_specific_004869 | 2.639                      | 3.142                      |                          |
| AN_specific_003492 | 2.469                      | 3.345                      |                          |
| AN_specific_004208 | 2.095                      | 2.442                      |                          |
| AN_specific_003500 | 2.094                      | 2.047                      |                          |
| AN_specific_009994 | 1.953                      | 3.088                      |                          |
| AN_specific_010845 | 1.401                      | 2.036                      |                          |
| AN_specific_003494 | 1.246                      | 1.657                      |                          |
| AN_specific_004869 | 2.639                      | 3.142                      |                          |
| AN_specific_004329 | 0.397                      | 1.314                      |                          |
| AN_specific_006844 | 2.053                      | 1.419                      |                          |
| AN_specific_002086 | 2.081                      | 0.669                      |                          |
| AN_specific_004329 | 0.397                      | 1.314                      |                          |
| AN_specific_002086 | 2.081                      | 0.669                      |                          |
| AN_specific_010690 | 3.500                      | 4.068                      |                          |
| AN_specific_003492 | 2.469                      | 3.345                      |                          |
| AN_specific_001565 | 2.254                      | 3.158                      |                          |

|                    |       |       |  |
|--------------------|-------|-------|--|
| AN_specific_004869 | 2.639 | 3.142 |  |
| AN_specific_010612 | 2.112 | 3.090 |  |
| AN_specific_009807 | 1.574 | 2.998 |  |
| AN_specific_001812 | 1.024 | 2.304 |  |
| AN_specific_003500 | 2.094 | 2.047 |  |
| AN_specific_009350 | 0.769 | 1.785 |  |
| AN_specific_003009 | 1.036 | 1.781 |  |
| AN_specific_003494 | 1.246 | 1.657 |  |
| AN_specific_003785 | 0.223 | 1.542 |  |
| AN_specific_002624 | 1.051 | 1.523 |  |
| AN_specific_009113 | 0.884 | 1.399 |  |
| AN_specific_001451 | 0.647 | 1.313 |  |
| AN_specific_005748 | 0.440 | 1.185 |  |



#### 4. Carbohydrate metabolism.

| Gene ID            | Expression ratio<br>(MZnO) | Expression ratio<br>(NZnO) | Presumed function          |
|--------------------|----------------------------|----------------------------|----------------------------|
| AN_specific_002637 | 3.158                      | 2.983                      | Carbohydrate<br>metabolism |
| AN_specific_003368 | 2.313                      | 1.285                      |                            |
| AN_specific_010337 | 2.040                      | 2.530                      |                            |
| AN_specific_010005 | 1.903                      | 2.687                      |                            |
| AN_specific_003520 | 1.792                      | 1.957                      |                            |
| AN_specific_008945 | 1.651                      | 1.761                      |                            |
| AN_specific_001212 | 1.593                      | 1.136                      |                            |
| AN_specific_001204 | 1.543                      | 2.653                      |                            |
| AN_specific_003579 | 1.307                      | 2.144                      |                            |
| AN_specific_009544 | 1.217                      | 1.469                      |                            |
| AN_specific_001649 | 1.161                      | 1.106                      |                            |
| AN_specific_002483 | 1.154                      | 3.695                      |                            |
| AN_specific_002624 | 1.051                      | 1.523                      |                            |
| AN_specific_000057 | 2.313                      | 2.132                      |                            |
| AN_specific_006767 | 0.326                      | 3.180                      |                            |
| AN_specific_010194 | 0.453                      | 0.721                      |                            |
| AN_specific_009440 | 0.693                      | 0.291                      |                            |
| AN_specific_009775 | 0.639                      | 0.393                      |                            |
| AN_specific_006610 | 0.672                      | 0.180                      |                            |
| AN_specific_005258 | 1.217                      | 1.668                      |                            |
| AN_specific_009398 | 0.740                      | 0.986                      |                            |
| AN_specific_004090 | 0.318                      | 0.365                      |                            |
| AN_specific_006844 | 2.053                      | 1.419                      |                            |
| AN_specific_006767 | 0.326                      | 3.180                      |                            |
| AN_specific_002086 | 2.081                      | 0.669                      |                            |

|                    |       |       |  |
|--------------------|-------|-------|--|
| AN_specific_009974 | 0.618 | 0.728 |  |
| AN_specific_009646 | 1.717 | 0.822 |  |
| AN_specific_006365 | 0.373 | 0.023 |  |
| AN_specific_002086 | 2.081 | 0.669 |  |
| AN_specific_008150 | 0.159 | 0.944 |  |
| AN_specific_006365 | 0.373 | 0.023 |  |
| AN_specific_006714 | 0.321 | 0.630 |  |
| AN_specific_001659 | 0.932 | 0.721 |  |
| AN_specific_006610 | 0.672 | 0.180 |  |
| AN_specific_000298 | 0.386 | 4.280 |  |
| AN_specific_002483 | 1.154 | 3.695 |  |
| AN_specific_003579 | 1.307 | 2.144 |  |
| AN_specific_009529 | 0.547 | 1.942 |  |
| AN_specific_005258 | 1.217 | 1.668 |  |
| AN_specific_010179 | 0.669 | 1.558 |  |
| AN_specific_007287 | 0.876 | 1.539 |  |
| AN_specific_005286 | 0.941 | 1.411 |  |
| AN_specific_004817 | 0.906 | 1.411 |  |
| AN_specific_005401 | 0.745 | 1.203 |  |
| AN_specific_009696 | 0.641 | 1.186 |  |
| AN_specific_010766 | 0.380 | 1.156 |  |
| AN_specific_000088 | 0.660 | 1.119 |  |
| AN_specific_002880 | 0.934 | 1.001 |  |

## 5. Catalytic activity.

| Gene ID            | Expression ratio<br>(MZnO) | Expression ratio<br>(NZnO) | Presumed function  |
|--------------------|----------------------------|----------------------------|--------------------|
| AN_specific_001910 | 1.543                      | 2.653                      | Catalytic activity |
| AN_specific_004654 | 9.046                      | 9.756                      |                    |
| AN_specific_010178 | 3.035                      | 3.170                      |                    |
| AN_specific_003009 | 2.313                      | 2.132                      |                    |
| AN_specific_010879 | 4.757                      | 1.775                      |                    |
| AN_specific_005133 | 3.464                      | 4.069                      |                    |
| AN_specific_008843 | 1.683                      | 1.241                      |                    |
| AN_specific_002404 | 0.373                      | 0.023                      |                    |
| AN_specific_000057 | 0.693                      | 1.043                      |                    |
| AN_specific_001432 | 0.662                      | 0.500                      |                    |
| AN_specific_010471 | 3.069                      | 1.266                      |                    |
| AN_specific_009474 | 1.476                      | 0.152                      |                    |
| AN_specific_002372 | 1.202                      | 1.044                      |                    |
| AN_specific_002958 | 2.150                      | 0.331                      |                    |
| AN_specific_010296 | 3.174                      | 4.896                      |                    |
| AN_specific_010090 | 1.912                      | 1.761                      |                    |
| AN_specific_006744 | 0.809                      | 0.612                      |                    |
| AN_specific_004005 | 0.902                      | 0.205                      |                    |
| AN_specific_004415 | 0.829                      | 0.761                      |                    |
| AN_specific_002042 | 0.749                      | 0.658                      |                    |
| AN_specific_004037 | 1.339                      | 0.608                      |                    |
| AN_specific_010825 | 0.467                      | 0.342                      |                    |
| AN_specific_006023 | 0.321                      | 0.533                      |                    |
| AN_specific_009219 | 1.141                      | 0.975                      |                    |
| AN_specific_008376 | 1.189                      | 1.152                      |                    |
| AN_specific_006744 | 1.683                      | 1.241                      |                    |
| AN_specific_002669 | 1.104                      | 0.438                      |                    |
| AN_specific_009142 | 0.120                      | 1.167                      |                    |
| AN_specific_011003 | 4.757                      | 1.775                      |                    |
| AN_specific_010676 | 0.667                      | 1.448                      |                    |

|                    |       |       |  |
|--------------------|-------|-------|--|
| AN_specific_002294 | 0.693 | 1.043 |  |
| AN_specific_000057 | 2.313 | 2.132 |  |
| AN_specific_009270 | 9.046 | 9.756 |  |
| AN_specific_009142 | 0.120 | 1.167 |  |
| AN_specific_001204 | 1.543 | 2.653 |  |
| AN_specific_000057 | 2.313 | 2.132 |  |
| AN_specific_008843 | 3.464 | 4.069 |  |
| AN_specific_006365 | 0.373 | 0.023 |  |
| AN_specific_002294 | 0.693 | 1.043 |  |
| AN_specific_003436 | 0.662 | 0.500 |  |
| AN_specific_008304 | 3.069 | 1.266 |  |
| AN_specific_003845 | 1.476 | 0.152 |  |
| AN_specific_000360 | 1.202 | 1.044 |  |
| AN_specific_003495 | 1.434 | 0.749 |  |
| AN_specific_005243 | 2.150 | 0.331 |  |
| AN_specific_000708 | 3.174 | 4.896 |  |
| AN_specific_002523 | 1.912 | 1.761 |  |
| AN_specific_003248 | 0.809 | 0.612 |  |
| AN_specific_008584 | 0.902 | 0.205 |  |
| AN_specific_006276 | 0.829 | 0.761 |  |
| AN_specific_006294 | 0.749 | 0.658 |  |
| AN_specific_010666 | 0.467 | 0.342 |  |
| AN_specific_007251 | 0.321 | 0.533 |  |
| AN_specific_003541 | 1.141 | 0.975 |  |
| AN_specific_007608 | 1.189 | 1.152 |  |
| AN_specific_006657 | 0.344 | 1.042 |  |

## 6. Electron transport.

| Gene ID            | Expression ratio<br>(MZnO) | Expression ratio<br>(NZnO) | Presumed function  |
|--------------------|----------------------------|----------------------------|--------------------|
| AN_specific_005733 | 9.371                      | 8.750                      | Electron transport |
| AN_specific_008288 | 7.691                      | 5.508                      |                    |
| AN_specific_009572 | 7.322                      | 7.183                      |                    |
| AN_specific_005734 | 5.968                      | 4.347                      |                    |
| AN_specific_007119 | 4.922                      | 5.376                      |                    |
| AN_specific_004858 | 4.100                      | 5.610                      |                    |
| AN_specific_005028 | 3.799                      | 4.586                      |                    |
| AN_specific_007657 | 3.778                      | 1.965                      |                    |
| AN_specific_009121 | 2.950                      | 1.883                      |                    |
| AN_specific_010463 | 2.830                      | 3.764                      |                    |
| AN_specific_004762 | 2.579                      | 3.068                      |                    |
| AN_specific_000956 | 2.549                      | 3.861                      |                    |
| AN_specific_007871 | 2.541                      | 2.089                      |                    |
| AN_specific_002534 | 2.372                      | 2.425                      |                    |
| AN_specific_007289 | 2.322                      | 3.528                      |                    |
| AN_specific_003037 | 2.307                      | 1.459                      |                    |
| AN_specific_006999 | 2.244                      | 1.140                      |                    |
| AN_specific_007599 | 2.213                      | 1.053                      |                    |
| AN_specific_001801 | 2.204                      | 1.524                      |                    |
| AN_specific_005667 | 2.164                      | 1.585                      |                    |
| AN_specific_004126 | 2.104                      | 2.103                      |                    |
| AN_specific_006071 | 2.061                      | 2.113                      |                    |
| AN_specific_005997 | 1.947                      | 2.127                      |                    |
| AN_specific_008376 | 1.881                      | 1.923                      |                    |
| AN_specific_010729 | 1.856                      | 1.511                      |                    |
| AN_specific_004335 | 1.833                      | 0.783                      |                    |
| AN_specific_001756 | 1.818                      | 1.805                      |                    |
| AN_specific_010663 | 1.784                      | 1.614                      |                    |
| AN_specific_005969 | 1.761                      | 0.971                      |                    |
| AN_specific_009257 | 1.699                      | 0.798                      |                    |
| AN_specific_004137 | 1.679                      | 1.230                      |                    |
| AN_specific_002852 | 1.628                      | 2.639                      |                    |

|                    |       |       |  |
|--------------------|-------|-------|--|
| AN_specific_010127 | 1.586 | 2.127 |  |
| AN_specific_001504 | 1.530 | 0.586 |  |
| AN_specific_002510 | 1.523 | 0.785 |  |
| AN_specific_001635 | 1.517 | 0.859 |  |
| AN_specific_005149 | 1.491 | 1.127 |  |
| AN_specific_004515 | 1.435 | 1.787 |  |
| AN_specific_005322 | 1.414 | 1.769 |  |
| AN_specific_009291 | 1.391 | 2.226 |  |
| AN_specific_002345 | 1.391 | 2.005 |  |
| AN_specific_007423 | 1.361 | 2.382 |  |
| AN_specific_008647 | 1.325 | 1.360 |  |
| AN_specific_010052 | 1.309 | 1.686 |  |
| AN_specific_009414 | 1.307 | 1.300 |  |
| AN_specific_011037 | 1.277 | 1.320 |  |
| AN_specific_008149 | 1.277 | 1.281 |  |
| AN_specific_010448 | 1.274 | 0.769 |  |
| AN_specific_009774 | 1.239 | 1.527 |  |
| AN_specific_005567 | 1.229 | 1.037 |  |
| AN_specific_005422 | 1.205 | 0.430 |  |
| AN_specific_003649 | 1.180 | 1.515 |  |
| AN_specific_004751 | 1.175 | 2.086 |  |
| AN_specific_010623 | 1.164 | 2.418 |  |
| AN_specific_001558 | 1.163 | 0.034 |  |
| AN_specific_010086 | 1.158 | 2.060 |  |
| AN_specific_010503 | 1.157 | 1.527 |  |
| AN_specific_002694 | 1.105 | 1.533 |  |
| AN_specific_003001 | 1.099 | 0.987 |  |
| AN_specific_006984 | 1.092 | 0.503 |  |
| AN_specific_003661 | 1.076 | 0.653 |  |
| AN_specific_007934 | 1.075 | 1.403 |  |
| AN_specific_004055 | 1.072 | 0.499 |  |
| AN_specific_008938 | 1.023 | 2.177 |  |
| AN_specific_007601 | 1.012 | 1.039 |  |
| AN_specific_005733 | 9.371 | 8.750 |  |
| AN_specific_005734 | 5.968 | 4.347 |  |
| AN_specific_004060 | 0.859 | 0.300 |  |

|                    |       |       |  |
|--------------------|-------|-------|--|
| AN_specific_006999 | 2.244 | 1.140 |  |
| AN_specific_003661 | 1.076 | 0.653 |  |
| AN_specific_008647 | 1.325 | 1.360 |  |
| AN_specific_002345 | 1.391 | 2.005 |  |
| AN_specific_002852 | 1.628 | 2.639 |  |
| AN_specific_001635 | 1.517 | 0.859 |  |
| AN_specific_001756 | 1.818 | 1.805 |  |
| AN_specific_010663 | 1.784 | 1.614 |  |
| AN_specific_010052 | 1.309 | 1.686 |  |
| AN_specific_010448 | 1.274 | 0.769 |  |
| AN_specific_008376 | 1.881 | 1.923 |  |
| AN_specific_010503 | 1.157 | 1.527 |  |
| AN_specific_008149 | 1.277 | 1.281 |  |
| AN_specific_008149 | 1.277 | 1.281 |  |
| AN_specific_005733 | 9.371 | 8.750 |  |
| AN_specific_004060 | 0.859 | 0.300 |  |
| AN_specific_007119 | 4.922 | 5.376 |  |
| AN_specific_006999 | 2.244 | 1.140 |  |
| AN_specific_005733 | 9.371 | 8.750 |  |
| AN_specific_000343 | 0.991 | 2.562 |  |
| AN_specific_004060 | 0.859 | 0.300 |  |
| AN_specific_007119 | 4.922 | 5.376 |  |
| AN_specific_006999 | 2.244 | 1.140 |  |
| AN_specific_005734 | 5.968 | 4.347 |  |
| AN_specific_003661 | 1.076 | 0.653 |  |
| AN_specific_009572 | 7.322 | 7.183 |  |
| AN_specific_007601 | 1.012 | 1.039 |  |
| AN_specific_005149 | 1.491 | 1.127 |  |
| AN_specific_004335 | 1.833 | 0.783 |  |
| AN_specific_004853 | 0.256 | 1.234 |  |
| AN_specific_006552 | 0.966 | 0.380 |  |
| AN_specific_008605 | 0.711 | 0.489 |  |
| AN_specific_006751 | 0.191 | 0.788 |  |
| AN_specific_001635 | 1.517 | 0.859 |  |
| AN_specific_007001 | 0.065 | 0.119 |  |
| AN_specific_007492 | 0.426 | 0.788 |  |

|                    |       |       |  |
|--------------------|-------|-------|--|
| AN_specific_002949 | 0.656 | 0.597 |  |
| AN_specific_002510 | 1.523 | 0.785 |  |
| AN_specific_006635 | 0.468 | 0.578 |  |
| AN_specific_001561 | 0.714 | 0.543 |  |
| AN_specific_001228 | 0.567 | 1.689 |  |
| AN_specific_005733 | 9.371 | 8.750 |  |
| AN_specific_009572 | 7.322 | 7.183 |  |
| AN_specific_007119 | 4.922 | 5.376 |  |
| AN_specific_005734 | 5.968 | 4.347 |  |
| AN_specific_010463 | 2.830 | 3.764 |  |
| AN_specific_005997 | 1.947 | 2.127 |  |
| AN_specific_006071 | 2.061 | 2.113 |  |
| AN_specific_007871 | 2.541 | 2.089 |  |
| AN_specific_010086 | 1.158 | 2.060 |  |
| AN_specific_002345 | 1.391 | 2.005 |  |
| AN_specific_006982 | 1.951 | 1.947 |  |
| AN_specific_010291 | 1.493 | 1.923 |  |
| AN_specific_004515 | 1.435 | 1.787 |  |
| AN_specific_005322 | 1.414 | 1.769 |  |
| AN_specific_010052 | 1.309 | 1.686 |  |
| AN_specific_010663 | 1.784 | 1.614 |  |
| AN_specific_005667 | 2.164 | 1.585 |  |
| AN_specific_002694 | 1.105 | 1.533 |  |
| AN_specific_009774 | 1.239 | 1.527 |  |
| AN_specific_010503 | 1.157 | 1.527 |  |
| AN_specific_003649 | 1.180 | 1.515 |  |
| AN_specific_010729 | 1.856 | 1.511 |  |
| AN_specific_005445 | 0.838 | 1.489 |  |
| AN_specific_005068 | 0.830 | 1.470 |  |
| AN_specific_001314 | 0.312 | 1.433 |  |
| AN_specific_003588 | 0.960 | 1.416 |  |
| AN_specific_007934 | 1.075 | 1.403 |  |



## 7. Fatty acid biosynthesis.

| Gene ID            | Expression ratio<br>(MZnO) | Expression ratio<br>(NZnO) | Presumed function          |
|--------------------|----------------------------|----------------------------|----------------------------|
| AN_specific_004534 | 2.641                      | 2.638                      | Fatty acid<br>biosynthesis |
| AN_specific_010629 | 1.721                      | 1.745                      |                            |
| AN_specific_003898 | 1.368                      | 1.359                      |                            |
| AN_specific_004983 | 1.341                      | 1.118                      |                            |
| AN_specific_002612 | 1.136                      | 0.437                      |                            |
| AN_specific_006726 | 1.136                      | 2.274                      |                            |
| AN_specific_000014 | 1.770                      | 0.578                      |                            |
| AN_specific_002294 | 0.693                      | 1.043                      |                            |
| AN_specific_001856 | 0.569                      | 0.126                      |                            |
| AN_specific_003549 | 0.139                      | 0.959                      |                            |
| AN_specific_001856 | 0.569                      | 0.126                      |                            |
| AN_specific_002819 | 0.593                      | 0.684                      |                            |
| AN_specific_009831 | 0.943                      | 1.105                      |                            |
| AN_specific_007972 | 0.385                      | 1.101                      |                            |
| AN_specific_003815 | 1.338                      | 3.650                      |                            |
| AN_specific_010220 | 0.774                      | 1.255                      |                            |

## 8. Fatty acid metabolism.

| Gene ID            | Expression ratio<br>(MZnO) | Expression ratio<br>(NZnO) | Presumed function        |
|--------------------|----------------------------|----------------------------|--------------------------|
| AN_specific_005733 | 9.371                      | 8.750                      | Fatty acid<br>metabolism |
| AN_specific_011003 | 4.757                      | 1.775                      |                          |
| AN_specific_002382 | 2.156                      | 2.841                      |                          |
| AN_specific_003429 | 1.550                      | 0.942                      |                          |
| AN_specific_001052 | 1.385                      | 0.313                      |                          |
| AN_specific_010448 | 1.274                      | 0.769                      |                          |
| AN_specific_007934 | 1.075                      | 1.403                      |                          |
| AN_specific_001469 | 10.897                     | 10.088                     |                          |

## 9. Glutathione activity.

| Gene ID            | Expression ratio<br>(MZnO) | Expression ratio<br>(NZnO) | Presumed function    |
|--------------------|----------------------------|----------------------------|----------------------|
| AN_specific_001618 | 3.474                      | 3.522                      | Glutathione activity |
| AN_specific_008843 | 3.464                      | 4.069                      |                      |
| AN_specific_008945 | 1.651                      | 1.761                      |                      |
| AN_specific_010101 | 1.092                      | 1.254                      |                      |
| AN_specific_001634 | 1.082                      | 0.199                      |                      |
| AN_specific_006610 | 0.672                      | 0.180                      |                      |
| AN_specific_009401 | 0.077                      | 0.858                      |                      |
| AN_specific_001634 | 1.082                      | 0.199                      |                      |

# 10. Glycine, serine and threonine metabolism.

| Gene ID            | Expression ratio<br>(MZnO) | Expression ratio<br>(NZnO) | Presumed function                             |
|--------------------|----------------------------|----------------------------|-----------------------------------------------|
| AN_specific_009572 | 7.322                      | 7.183                      | glycine serine and<br>threonine<br>metabolism |
| AN_specific_002803 | 5.829                      | 4.870                      |                                               |
| AN_specific_005198 | 3.709                      | 1.965                      |                                               |
| AN_specific_010090 | 2.337                      | 3.144                      |                                               |
| AN_specific_005969 | 1.761                      | 0.971                      |                                               |
| AN_specific_001949 | 1.728                      | 1.807                      |                                               |
| AN_specific_011021 | 1.688                      | 1.968                      |                                               |
| AN_specific_010581 | 1.684                      | 1.896                      |                                               |
| AN_specific_009660 | 1.613                      | 1.599                      |                                               |
| AN_specific_009493 | 1.569                      | 1.535                      |                                               |
| AN_specific_010845 | 1.401                      | 2.036                      |                                               |
| AN_specific_010052 | 1.309                      | 1.686                      |                                               |
| AN_specific_002992 | 1.292                      | 2.539                      |                                               |
| AN_specific_002951 | 1.041                      | 0.889                      |                                               |
| AN_specific_009493 | 1.569                      | 1.535                      |                                               |
| AN_specific_010052 | 1.309                      | 1.686                      |                                               |
| AN_specific_002372 | 1.339                      | 0.608                      |                                               |
| AN_specific_005490 | 2.565                      | 2.399                      |                                               |
| AN_specific_010844 | 0.536                      | 0.634                      |                                               |
| AN_specific_009455 | 0.931                      | 2.138                      |                                               |
| AN_specific_002365 | 1.799                      | 2.212                      |                                               |
| AN_specific_007125 | 0.960                      | 1.959                      |                                               |
| AN_specific_010047 | 2.526                      | 1.109                      |                                               |
| AN_specific_005121 | 1.332                      | 1.357                      |                                               |
| AN_specific_005503 | 2.089                      | 2.017                      |                                               |
| AN_specific_005286 | 0.941                      | 1.411                      |                                               |
| AN_specific_009667 | 1.178                      | 1.308                      |                                               |
| AN_specific_001818 | 0.222                      | 0.429                      |                                               |
| AN_specific_002803 | 5.829                      | 4.870                      |                                               |

|                    |       |       |  |
|--------------------|-------|-------|--|
| AN_specific_007119 | 4.922 | 5.376 |  |
| AN_specific_010839 | 1.062 | 1.781 |  |
| AN_specific_005243 | 2.150 | 0.331 |  |
| AN_specific_003176 | 1.646 | 2.607 |  |
| AN_specific_006294 | 0.749 | 0.658 |  |
| AN_specific_009423 | 0.644 | 0.176 |  |
| AN_specific_004738 | 0.862 | 2.324 |  |
| AN_specific_010645 | 0.763 | 0.604 |  |
| AN_specific_010845 | 1.401 | 2.036 |  |
| AN_specific_005198 | 3.709 | 1.965 |  |
| AN_specific_002992 | 1.292 | 2.539 |  |
| AN_specific_011021 | 1.688 | 1.968 |  |
| AN_specific_010581 | 1.684 | 1.896 |  |
| AN_specific_001949 | 1.728 | 1.807 |  |
| AN_specific_009350 | 0.769 | 1.785 |  |
| AN_specific_010482 | 0.771 | 1.543 |  |
| AN_specific_005640 | 0.880 | 1.342 |  |
|                    |       |       |  |

## 11. Lysine biosynthesis.

| Gene ID            | Expression ratio<br>(MZnO) | Expression ratio<br>(NZnO) | Presumed function   |
|--------------------|----------------------------|----------------------------|---------------------|
| AN_specific_010505 | 2.832                      | 4.000                      | Lysine biosynthesis |
| AN_specific_002317 | 2.703                      | 2.016                      |                     |
| AN_specific_009064 | 2.490                      | 3.422                      |                     |
| AN_specific_005653 | 2.089                      | 1.167                      |                     |
| AN_specific_010804 | 2.081                      | 2.551                      |                     |
| AN_specific_003495 | 1.434                      | 0.749                      |                     |
| AN_specific_009941 | 1.375                      | 0.562                      |                     |
| AN_specific_003541 | 1.141                      | 0.975                      |                     |
| AN_specific_009780 | 1.078                      | 1.303                      |                     |
| AN_specific_003896 | 1.076                      | 0.878                      |                     |
| AN_specific_003436 | 0.662                      | 0.500                      |                     |
| AN_specific_008584 | 0.902                      | 0.205                      |                     |
| AN_specific_009064 | 2.490                      | 3.422                      |                     |
| AN_specific_010482 | 0.771                      | 1.543                      |                     |
| AN_specific_009780 | 1.078                      | 1.303                      |                     |

## 12. Methyl transferase activity.

| Gene ID            | Expression ratio<br>(MZnO) | Expression ratio<br>(NZnO) | Presumed function              |
|--------------------|----------------------------|----------------------------|--------------------------------|
| AN_specific_001039 | 1.476                      | 1.672                      | Methyl transferase<br>activity |
| AN_specific_009992 | 1.450                      | 1.305                      |                                |
| AN_specific_008026 | 1.421                      | 2.189                      |                                |
| AN_specific_010845 | 1.401                      | 2.036                      |                                |
| AN_specific_009098 | 1.371                      | 0.784                      |                                |
| AN_specific_009513 | 1.301                      | 1.414                      |                                |
| AN_specific_010904 | 1.293                      | 1.406                      |                                |
| AN_specific_002992 | 1.292                      | 2.539                      |                                |
| AN_specific_005462 | 1.254                      | 2.080                      |                                |
| AN_specific_010925 | 1.111                      | 2.007                      |                                |
| AN_specific_009780 | 1.078                      | 1.303                      |                                |
| AN_specific_000720 | 1.058                      | 1.563                      |                                |
| AN_specific_002951 | 1.041                      | 0.889                      |                                |
| AN_specific_004741 | 1.026                      | 1.498                      |                                |
| AN_specific_003430 | 1.024                      | 1.600                      |                                |
| AN_specific_010714 | 1.009                      | 1.407                      |                                |
| AN_specific_009001 | 1.009                      | 1.925                      |                                |

## 13. Mitochondrial activity.

| Gene ID            | Expression ratio<br>(MZnO) | Expression ratio<br>(NZnO) | Presumed function      |
|--------------------|----------------------------|----------------------------|------------------------|
| AN_specific_009079 | 3.624                      | 0.564                      | Mitochondrial activity |
| AN_specific_002895 | 2.948                      | 3.619                      |                        |
| AN_specific_009946 | 2.067                      | 2.415                      |                        |
| AN_specific_005436 | 1.996                      | 2.571                      |                        |
| AN_specific_001923 | 1.990                      | 2.646                      |                        |
| AN_specific_004828 | 1.615                      | 1.777                      |                        |
| AN_specific_007156 | 1.526                      | 1.434                      |                        |
| AN_specific_010691 | 1.503                      | 1.990                      |                        |
| AN_specific_009635 | 1.355                      | 1.608                      |                        |
| AN_specific_004994 | 1.280                      | 1.992                      |                        |
| AN_specific_011037 | 1.277                      | 1.320                      |                        |
| AN_specific_001197 | 1.253                      | 1.137                      |                        |
| AN_specific_004066 | 1.239                      | 1.438                      |                        |
| AN_specific_003996 | 1.208                      | 1.813                      |                        |
| AN_specific_009743 | 1.200                      | 1.512                      |                        |
| AN_specific_010503 | 1.157                      | 1.527                      |                        |
| AN_specific_010155 | 1.145                      | 1.335                      |                        |
| AN_specific_004975 | 1.132                      | 1.332                      |                        |
| AN_specific_001372 | 1.097                      | 1.145                      |                        |
| AN_specific_002641 | 1.086                      | 1.309                      |                        |
| AN_specific_010392 | 1.050                      | 1.930                      |                        |
| AN_specific_006691 | 0.980                      | 1.040                      |                        |
| AN_specific_010503 | 1.157                      | 1.527                      |                        |
| AN_specific_008113 | 0.640                      | 0.067                      |                        |
| AN_specific_006691 | 0.980                      | 1.040                      |                        |
| AN_specific_009079 | 3.624                      | 0.564                      |                        |
| AN_specific_002895 | 2.948                      | 3.619                      |                        |
| AN_specific_001372 | 1.097                      | 1.145                      |                        |
| AN_specific_005436 | 1.996                      | 2.571                      |                        |
| AN_specific_001804 | 0.805                      | 2.419                      |                        |
| AN_specific_009946 | 2.067                      | 2.415                      |                        |
| AN_specific_004581 | 0.927                      | 2.319                      |                        |



|                    |       |       |  |
|--------------------|-------|-------|--|
| AN_specific_004994 | 1.280 | 1.992 |  |
| AN_specific_010691 | 1.503 | 1.990 |  |
| AN_specific_009635 | 1.355 | 1.608 |  |
| AN_specific_010503 | 1.157 | 1.527 |  |
| AN_specific_004066 | 1.239 | 1.438 |  |
| AN_specific_007156 | 1.526 | 1.434 |  |
| AN_specific_004975 | 1.132 | 1.332 |  |
| AN_specific_002641 | 1.086 | 1.309 |  |
| AN_specific_005244 | 0.948 | 1.284 |  |
| AN_specific_010011 | 0.572 | 1.218 |  |
| AN_specific_001372 | 1.097 | 1.145 |  |
| AN_specific_004474 | 0.599 | 1.141 |  |
| AN_specific_004992 | 0.932 | 1.053 |  |
| AN_specific_006691 | 0.980 | 1.040 |  |
| AN_specific_005848 | 0.518 | 1.013 |  |

#### **14. Oxidoreductase activity.**

| Gene ID            | Expression ratio<br>(MZnO) | Expression ratio<br>(NZnO) | Presumed function          |
|--------------------|----------------------------|----------------------------|----------------------------|
| AN_specific_001469 | 10.897                     | 10.088                     | Oxidoreductase<br>activity |
| AN_specific_009572 | 7.322                      | 7.183                      |                            |
| AN_specific_005734 | 5.968                      | 4.347                      |                            |
| AN_specific_002803 | 5.829                      | 4.870                      |                            |
| AN_specific_007119 | 4.922                      | 5.376                      |                            |
| AN_specific_010244 | 4.325                      | 3.945                      |                            |
| AN_specific_009277 | 4.232                      | 3.288                      |                            |
| AN_specific_004858 | 4.100                      | 5.610                      |                            |
| AN_specific_005028 | 3.799                      | 4.586                      |                            |
| AN_specific_000796 | 3.693                      | 4.575                      |                            |
| AN_specific_009079 | 3.624                      | 0.564                      |                            |
| AN_specific_001473 | 3.572                      | 3.467                      |                            |
| AN_specific_008843 | 3.464                      | 4.069                      |                            |
| AN_specific_009127 | 3.108                      | 3.266                      |                            |
| AN_specific_009121 | 2.950                      | 1.883                      |                            |
| AN_specific_010505 | 2.832                      | 4.000                      |                            |
| AN_specific_010463 | 2.830                      | 3.764                      |                            |
| AN_specific_007740 | 2.681                      | 1.467                      |                            |
| AN_specific_004534 | 2.641                      | 2.638                      |                            |
| AN_specific_004869 | 2.639                      | 3.142                      |                            |
| AN_specific_005543 | 2.582                      | 2.701                      |                            |
| AN_specific_004762 | 2.579                      | 3.068                      |                            |
| AN_specific_000956 | 2.549                      | 3.861                      |                            |
| AN_specific_002534 | 2.372                      | 2.425                      |                            |
| AN_specific_004749 | 2.372                      | 0.735                      |                            |
| AN_specific_010751 | 2.342                      | 3.207                      |                            |
| AN_specific_003037 | 2.307                      | 1.459                      |                            |
| AN_specific_006703 | 2.250                      | 1.834                      |                            |
| AN_specific_006999 | 2.244                      | 1.140                      |                            |
| AN_specific_007599 | 2.213                      | 1.053                      |                            |
| AN_specific_001801 | 2.204                      | 1.524                      |                            |
| AN_specific_008812 | 2.203                      | 3.163                      |                            |

|                    |       |       |  |
|--------------------|-------|-------|--|
| AN_specific_005667 | 2.164 | 1.585 |  |
| AN_specific_009972 | 2.160 | 2.320 |  |
| AN_specific_002382 | 2.156 | 2.841 |  |
| AN_specific_005370 | 2.145 | 1.969 |  |
| AN_specific_004126 | 2.104 | 2.103 |  |
| AN_specific_006071 | 2.061 | 2.113 |  |
| AN_specific_003628 | 2.025 | 1.005 |  |
| AN_specific_010816 | 1.981 | 2.697 |  |
| AN_specific_001698 | 1.965 | 1.641 |  |
| AN_specific_006982 | 1.951 | 1.947 |  |
| AN_specific_008046 | 1.844 | 0.231 |  |
| AN_specific_004335 | 1.833 | 0.783 |  |
| AN_specific_010663 | 1.784 | 1.614 |  |
| AN_specific_004752 | 1.771 | 1.992 |  |
| AN_specific_005969 | 1.761 | 0.971 |  |
| AN_specific_009331 | 1.730 | 2.102 |  |
| AN_specific_009257 | 1.699 | 0.798 |  |
| AN_specific_005279 | 1.686 | 1.754 |  |
| AN_specific_008945 | 1.651 | 1.761 |  |
| AN_specific_010736 | 1.638 | 1.931 |  |
| AN_specific_010809 | 1.622 | 0.602 |  |
| AN_specific_004755 | 1.592 | 1.904 |  |
| AN_specific_009493 | 1.569 | 1.535 |  |
| AN_specific_000450 | 1.550 | 0.999 |  |
| AN_specific_003429 | 1.550 | 0.942 |  |
| AN_specific_001078 | 1.535 | 2.822 |  |
| AN_specific_002510 | 1.523 | 0.785 |  |
| AN_specific_001635 | 1.517 | 0.859 |  |
| AN_specific_003388 | 1.463 | 2.173 |  |
| AN_specific_009761 | 1.444 | 0.920 |  |
| AN_specific_001458 | 1.432 | 0.969 |  |
| AN_specific_005322 | 1.414 | 1.769 |  |
| AN_specific_005608 | 1.411 | 1.355 |  |
| AN_specific_009291 | 1.391 | 2.226 |  |
| AN_specific_002345 | 1.391 | 2.005 |  |
| AN_specific_001052 | 1.385 | 0.313 |  |

|                    |       |       |  |
|--------------------|-------|-------|--|
| AN_specific_010187 | 1.384 | 2.692 |  |
| AN_specific_000980 | 1.381 | 1.705 |  |
| AN_specific_003898 | 1.368 | 1.359 |  |
| AN_specific_007423 | 1.361 | 2.382 |  |
| AN_specific_004983 | 1.341 | 1.118 |  |
| AN_specific_009737 | 1.331 | 1.792 |  |
| AN_specific_010052 | 1.309 | 1.686 |  |
| AN_specific_009414 | 1.307 | 1.300 |  |
| AN_specific_009774 | 1.239 | 1.527 |  |
| AN_specific_005422 | 1.205 | 0.430 |  |
| AN_specific_007739 | 1.195 | 2.379 |  |
| AN_specific_004405 | 1.177 | 1.395 |  |
| AN_specific_004751 | 1.175 | 2.086 |  |
| AN_specific_001558 | 1.163 | 0.034 |  |
| AN_specific_002748 | 1.162 | 1.695 |  |
| AN_specific_001649 | 1.161 | 1.106 |  |
| AN_specific_010086 | 1.158 | 2.060 |  |
| AN_specific_010503 | 1.157 | 1.527 |  |
| AN_specific_005440 | 1.144 | 1.603 |  |
| AN_specific_007011 | 1.123 | 1.557 |  |
| AN_specific_009778 | 1.122 | 0.736 |  |
| AN_specific_002694 | 1.105 | 1.533 |  |
| AN_specific_003001 | 1.099 | 0.987 |  |
| AN_specific_010101 | 1.092 | 1.254 |  |
| AN_specific_006984 | 1.092 | 0.503 |  |
| AN_specific_005172 | 1.088 | 1.305 |  |
| AN_specific_001634 | 1.082 | 0.199 |  |
| AN_specific_003661 | 1.076 | 0.653 |  |
| AN_specific_004055 | 1.072 | 0.499 |  |
| AN_specific_008943 | 1.058 | 2.242 |  |
| AN_specific_004946 | 1.054 | 0.107 |  |
| AN_specific_002897 | 1.040 | 0.756 |  |
| AN_specific_007601 | 1.012 | 1.039 |  |
| AN_specific_005402 | 1.001 | 0.044 |  |
| AN_specific_008843 | 3.464 | 4.069 |  |
| AN_specific_009121 | 2.950 | 1.883 |  |

|                    |       |       |  |
|--------------------|-------|-------|--|
| AN_specific_004060 | 0.859 | 0.300 |  |
| AN_specific_005608 | 1.411 | 1.355 |  |
| AN_specific_006999 | 2.244 | 1.140 |  |
| AN_specific_002382 | 2.156 | 2.841 |  |
| AN_specific_005440 | 1.144 | 1.603 |  |
| AN_specific_002709 | 0.988 | 0.519 |  |
| AN_specific_003628 | 2.025 | 1.005 |  |
| AN_specific_002294 | 0.693 | 1.043 |  |
| AN_specific_003501 | 0.148 | 0.432 |  |
| AN_specific_003661 | 1.076 | 0.653 |  |
| AN_specific_009127 | 3.108 | 3.266 |  |
| AN_specific_002345 | 1.391 | 2.005 |  |
| AN_specific_002935 | 0.545 | 1.131 |  |
| AN_specific_004751 | 1.175 | 2.086 |  |
| AN_specific_000956 | 2.549 | 3.861 |  |
| AN_specific_010663 | 1.784 | 1.614 |  |
| AN_specific_009493 | 1.569 | 1.535 |  |
| AN_specific_001856 | 0.569 | 0.126 |  |
| AN_specific_007125 | 0.960 | 1.959 |  |
| AN_specific_002377 | 0.766 | 1.686 |  |
| AN_specific_010052 | 1.309 | 1.686 |  |
| AN_specific_008945 | 1.651 | 1.761 |  |
| AN_specific_005370 | 2.145 | 1.969 |  |
| AN_specific_004752 | 1.771 | 1.992 |  |
| AN_specific_004869 | 2.639 | 3.142 |  |
| AN_specific_004329 | 0.397 | 1.314 |  |
| AN_specific_004904 | 0.956 | 0.128 |  |
| AN_specific_010503 | 1.157 | 1.527 |  |
| AN_specific_006703 | 2.250 | 1.834 |  |
| AN_specific_010244 | 4.325 | 3.945 |  |
| AN_specific_004060 | 0.859 | 0.300 |  |
| AN_specific_003628 | 2.025 | 1.005 |  |
| AN_specific_002382 | 2.156 | 2.841 |  |
| AN_specific_008843 | 3.464 | 4.069 |  |
| AN_specific_006999 | 2.244 | 1.140 |  |
| AN_specific_002294 | 0.693 | 1.043 |  |

|                    |       |       |  |
|--------------------|-------|-------|--|
| AN_specific_002510 | 1.523 | 0.785 |  |
| AN_specific_002345 | 1.391 | 2.005 |  |
| AN_specific_010736 | 1.638 | 1.931 |  |
| AN_specific_005734 | 5.968 | 4.347 |  |
| AN_specific_002819 | 0.593 | 0.684 |  |
| AN_specific_003661 | 1.076 | 0.653 |  |
| AN_specific_001801 | 2.204 | 1.524 |  |
| AN_specific_009127 | 3.108 | 3.266 |  |
| AN_specific_009572 | 7.322 | 7.183 |  |
| AN_specific_002382 | 2.156 | 2.841 |  |
| AN_specific_007208 | 0.001 | 0.072 |  |
| AN_specific_007601 | 1.012 | 1.039 |  |
| AN_specific_003037 | 2.307 | 1.459 |  |
| AN_specific_003628 | 2.025 | 1.005 |  |
| AN_specific_004335 | 1.833 | 0.783 |  |
| AN_specific_001634 | 1.082 | 0.199 |  |
| AN_specific_009257 | 1.699 | 0.798 |  |
| AN_specific_004755 | 1.592 | 1.904 |  |
| AN_specific_004853 | 0.256 | 1.234 |  |
| AN_specific_005172 | 1.088 | 1.305 |  |
| AN_specific_000980 | 1.381 | 1.705 |  |
| AN_specific_007599 | 2.213 | 1.053 |  |
| AN_specific_008605 | 0.711 | 0.489 |  |
| AN_specific_001635 | 1.517 | 0.859 |  |
| AN_specific_006703 | 2.250 | 1.834 |  |
| AN_specific_007001 | 0.065 | 0.119 |  |
| AN_specific_003805 | 0.480 | 0.679 |  |
| AN_specific_007492 | 0.426 | 0.788 |  |
| AN_specific_004858 | 4.100 | 5.610 |  |
| AN_specific_002949 | 0.656 | 0.597 |  |
| AN_specific_002510 | 1.523 | 0.785 |  |
| AN_specific_001228 | 0.567 | 1.689 |  |
| AN_specific_002935 | 0.545 | 1.131 |  |
| AN_specific_004738 | 0.862 | 2.324 |  |
| AN_specific_007009 | 0.074 | 0.115 |  |
| AN_specific_009493 | 1.569 | 1.535 |  |

|                    |       |       |  |
|--------------------|-------|-------|--|
| AN_specific_005028 | 3.799 | 4.586 |  |
| AN_specific_005734 | 5.968 | 4.347 |  |
| AN_specific_008843 | 3.464 | 4.069 |  |
| AN_specific_010505 | 2.832 | 4.000 |  |
| AN_specific_010244 | 4.325 | 3.945 |  |
| AN_specific_000956 | 2.549 | 3.861 |  |
| AN_specific_005734 | 5.968 | 4.347 |  |
| AN_specific_008843 | 3.464 | 4.069 |  |
| AN_specific_010505 | 2.832 | 4.000 |  |
| AN_specific_010244 | 4.325 | 3.945 |  |
| AN_specific_000956 | 2.549 | 3.861 |  |
| AN_specific_009127 | 3.108 | 3.266 |  |
| AN_specific_010751 | 2.342 | 3.207 |  |
| AN_specific_008812 | 2.203 | 3.163 |  |
| AN_specific_004869 | 2.639 | 3.142 |  |
| AN_specific_004762 | 2.579 | 3.068 |  |
| AN_specific_002382 | 2.156 | 2.841 |  |
| AN_specific_005543 | 2.582 | 2.701 |  |
| AN_specific_010816 | 1.981 | 2.697 |  |
| AN_specific_004534 | 2.641 | 2.638 |  |
| AN_specific_002534 | 2.372 | 2.425 |  |
| AN_specific_007423 | 1.361 | 2.382 |  |
| AN_specific_003963 | 2.487 | 2.373 |  |
| AN_specific_004738 | 0.862 | 2.324 |  |
| AN_specific_009972 | 2.160 | 2.320 |  |
| AN_specific_003948 | 0.515 | 2.306 |  |
| AN_specific_008943 | 1.058 | 2.242 |  |
| AN_specific_009291 | 1.391 | 2.226 |  |
| AN_specific_003388 | 1.463 | 2.173 |  |
| AN_specific_006071 | 2.061 | 2.113 |  |
| AN_specific_004126 | 2.104 | 2.103 |  |
| AN_specific_009331 | 1.730 | 2.102 |  |
| AN_specific_004751 | 1.175 | 2.086 |  |
| AN_specific_010086 | 1.158 | 2.060 |  |
| AN_specific_002345 | 1.391 | 2.005 |  |
| AN_specific_004752 | 1.771 | 1.992 |  |

|                    |       |       |  |
|--------------------|-------|-------|--|
| AN_specific_005370 | 2.145 | 1.969 |  |
| AN_specific_007125 | 0.960 | 1.959 |  |
| AN_specific_006982 | 1.951 | 1.947 |  |
| AN_specific_010736 | 1.638 | 1.931 |  |
| AN_specific_004755 | 1.592 | 1.904 |  |
| AN_specific_009121 | 2.950 | 1.883 |  |
| AN_specific_006703 | 2.250 | 1.834 |  |
| AN_specific_009737 | 1.331 | 1.792 |  |
| AN_specific_005322 | 1.414 | 1.769 |  |
| AN_specific_008945 | 1.651 | 1.761 |  |
| AN_specific_005279 | 1.686 | 1.754 |  |
| AN_specific_000980 | 1.381 | 1.705 |  |
| AN_specific_002748 | 1.162 | 1.695 |  |
| AN_specific_003695 | 0.031 | 1.693 |  |
| AN_specific_001228 | 0.567 | 1.689 |  |
| AN_specific_002377 | 0.766 | 1.686 |  |
| AN_specific_010052 | 1.309 | 1.686 |  |
| AN_specific_001698 | 1.965 | 1.641 |  |
| AN_specific_010663 | 1.784 | 1.614 |  |
| AN_specific_005440 | 1.144 | 1.603 |  |
| AN_specific_008797 | 0.386 | 1.596 |  |
| AN_specific_005667 | 2.164 | 1.585 |  |
| AN_specific_009493 | 1.569 | 1.535 |  |
| AN_specific_002694 | 1.105 | 1.533 |  |
| AN_specific_009774 | 1.239 | 1.527 |  |
| AN_specific_010503 | 1.157 | 1.527 |  |
| AN_specific_001801 | 2.204 | 1.524 |  |
| AN_specific_004914 | 0.952 | 1.487 |  |
| AN_specific_007740 | 2.681 | 1.467 |  |
| AN_specific_003037 | 2.307 | 1.459 |  |
| AN_specific_004405 | 1.177 | 1.395 |  |
| AN_specific_006626 | 0.640 | 1.389 |  |
| AN_specific_008070 | 0.645 | 1.369 |  |
| AN_specific_003898 | 1.368 | 1.359 |  |
| AN_specific_005608 | 1.411 | 1.355 |  |
| AN_specific_004329 | 0.397 | 1.314 |  |



|                    |       |       |  |
|--------------------|-------|-------|--|
| AN_specific_005172 | 1.088 | 1.305 |  |
| AN_specific_009414 | 1.307 | 1.300 |  |
| AN_specific_001585 | 0.414 | 1.282 |  |
| AN_specific_010101 | 1.092 | 1.254 |  |
| AN_specific_007113 | 0.084 | 1.249 |  |
| AN_specific_004853 | 0.256 | 1.234 |  |
| AN_specific_010011 | 0.572 | 1.218 |  |
| AN_specific_009304 | 0.164 | 1.213 |  |
| AN_specific_009676 | 0.262 | 1.175 |  |
| AN_specific_009671 | 0.753 | 1.144 |  |
| AN_specific_006999 | 2.244 | 1.140 |  |
| AN_specific_002935 | 0.545 | 1.131 |  |
| AN_specific_001649 | 1.161 | 1.106 |  |
| AN_specific_004569 | 0.808 | 1.102 |  |
| AN_specific_007972 | 0.385 | 1.101 |  |
| AN_specific_009669 | 0.960 | 1.086 |  |
| AN_specific_007599 | 2.213 | 1.053 |  |
| AN_specific_002294 | 0.693 | 1.043 |  |
| AN_specific_003530 | 0.847 | 1.016 |  |
| AN_specific_003628 | 2.025 | 1.005 |  |

## 15. Pentosephosphate pathway.

| Gene ID            | Expression ratio<br>(MZnO) | Expression ratio<br>(NZnO) | Presumed function            |
|--------------------|----------------------------|----------------------------|------------------------------|
| AN_specific_009816 | 3.335                      | 3.858                      | Pentose Phosphate<br>Pathway |
| AN_specific_001801 | 2.204                      | 1.524                      |                              |
| AN_specific_002345 | 1.391                      | 2.005                      |                              |
| AN_specific_003661 | 1.076                      | 0.653                      |                              |
| AN_specific_009398 | 0.740                      | 0.986                      |                              |

#### 16. SOD activity.

| Gene ID            | Expression ratio<br>(MZnO) | Expression ratio<br>(NZnO) | Presumed function                 |
|--------------------|----------------------------|----------------------------|-----------------------------------|
| AN_specific_006855 | 1.272                      | 1.933                      | Super oxide<br>dismutase activity |
| AN_specific_004967 | 1.182                      | 1.286                      |                                   |

## 17. Serine activity.

| Gene ID            | Expression ratio<br>(MZnO) | Expression ratio<br>(NZnO) | Presumed function |
|--------------------|----------------------------|----------------------------|-------------------|
| AN_specific_009688 | 1.290                      | 1.759                      | Serine activity   |
| AN_specific_004596 | 1.259                      | 1.861                      |                   |
| AN_specific_006478 | 1.234                      | 1.205                      |                   |
| AN_specific_004764 | 1.212                      | 0.029                      |                   |
| AN_specific_009445 | 1.207                      | 0.394                      |                   |
| AN_specific_009667 | 1.178                      | 1.308                      |                   |
| AN_specific_008212 | 1.131                      | 1.923                      |                   |
| AN_specific_010261 | 1.062                      | 1.913                      |                   |
| AN_specific_010839 | 1.062                      | 1.781                      |                   |
| AN_specific_004654 | 1.059                      | 1.467                      |                   |
| AN_specific_002542 | 1.043                      | 1.718                      |                   |
| AN_specific_005231 | 1.043                      | 0.639                      |                   |
| AN_specific_004844 | 1.027                      | 0.691                      |                   |
| AN_specific_008938 | 1.023                      | 2.177                      |                   |
| AN_specific_001060 | 1.017                      | 1.312                      |                   |
| AN_specific_002803 | 5.829                      | 4.870                      |                   |
| AN_specific_009493 | 1.569                      | 1.535                      |                   |
| AN_specific_004738 | 0.862                      | 2.324                      |                   |
| AN_specific_002372 | 1.339                      | 0.608                      |                   |
| AN_specific_010666 | 0.467                      | 0.342                      |                   |
| AN_specific_010844 | 0.536                      | 0.634                      |                   |
| AN_specific_002317 | 2.703                      | 2.016                      |                   |
| AN_specific_005198 | 3.709                      | 1.965                      |                   |
| AN_specific_007125 | 0.960                      | 1.959                      |                   |
| AN_specific_010581 | 1.684                      | 1.896                      |                   |
| AN_specific_004596 | 1.259                      | 1.861                      |                   |
| AN_specific_001949 | 1.728                      | 1.807                      |                   |
| AN_specific_009350 | 0.769                      | 1.785                      |                   |
| AN_specific_003475 | 1.615                      | 1.756                      |                   |
| AN_specific_004850 | 0.426                      | 1.725                      |                   |
| AN_specific_010052 | 1.309                      | 1.686                      |                   |
| AN_specific_009660 | 1.613                      | 1.599                      |                   |
| AN_specific_009685 | 1.531                      | 1.590                      |                   |

|                    |       |       |  |
|--------------------|-------|-------|--|
| AN_specific_006933 | 2.022 | 1.550 |  |
| AN_specific_010482 | 0.771 | 1.543 |  |
| AN_specific_009493 | 1.569 | 1.535 |  |
| AN_specific_008626 | 1.456 | 1.505 |  |
| AN_specific_004173 | 1.423 | 1.490 |  |
| AN_specific_004554 | 0.823 | 1.432 |  |
| AN_specific_005286 | 0.941 | 1.411 |  |
| AN_specific_005121 | 1.332 | 1.357 |  |
| AN_specific_004573 | 1.576 | 1.345 |  |
| AN_specific_005640 | 0.880 | 1.342 |  |
| AN_specific_004951 | 1.439 | 1.339 |  |
| AN_specific_010773 | 0.779 | 1.334 |  |
| AN_specific_001060 | 1.017 | 1.312 |  |
| AN_specific_000122 | 0.942 | 1.301 |  |
| AN_specific_002957 | 0.630 | 1.251 |  |
| AN_specific_001499 | 0.782 | 1.206 |  |
| AN_specific_002096 | 0.621 | 1.187 |  |
| AN_specific_009696 | 0.641 | 1.186 |  |
| AN_specific_004820 | 0.720 | 1.162 |  |
| AN_specific_004547 | 0.281 | 1.150 |  |
| AN_specific_002185 | 0.979 | 1.141 |  |
| AN_specific_000275 | 0.244 | 1.109 |  |
| AN_specific_010047 | 2.526 | 1.109 |  |
| AN_specific_003285 | 0.735 | 1.063 |  |
| AN_specific_009296 | 0.499 | 1.028 |  |
| AN_specific_003585 | 0.387 | 1.010 |  |
| AN_specific_009762 | 0.138 | 1.008 |  |
| AN_specific_003204 | 2.850 | 1.005 |  |

## 18. Starch and sucrose metabolism.

| Gene ID            | Expression ratio<br>(MZnO) | Expression ratio<br>(NZnO) | Presumed function             |
|--------------------|----------------------------|----------------------------|-------------------------------|
| AN_specific_003204 | 2.850                      | 1.005                      | Starch and Sucrose metabolism |
| AN_specific_008579 | 2.749                      | 3.563                      |                               |
| AN_specific_010047 | 2.526                      | 1.109                      |                               |
| AN_specific_003368 | 2.313                      | 1.285                      |                               |
| AN_specific_008670 | 2.127                      | 1.893                      |                               |
| AN_specific_006825 | 2.003                      | 2.657                      |                               |
| AN_specific_010478 | 2.001                      | 2.083                      |                               |
| AN_specific_010829 | 1.954                      | 2.755                      |                               |
| AN_specific_009681 | 1.792                      | 1.557                      |                               |
| AN_specific_001891 | 1.656                      | 1.740                      |                               |
| AN_specific_003475 | 1.615                      | 1.756                      |                               |
| AN_specific_001105 | 1.606                      | 0.676                      |                               |
| AN_specific_010000 | 1.605                      | 2.177                      |                               |
| AN_specific_009177 | 1.470                      | 1.890                      |                               |
| AN_specific_002584 | 1.385                      | 1.582                      |                               |
| AN_specific_010018 | 1.382                      | 0.829                      |                               |
| AN_specific_009382 | 1.291                      | 1.644                      |                               |
| AN_specific_009667 | 1.178                      | 1.308                      |                               |
| AN_specific_002483 | 1.154                      | 3.695                      |                               |
| AN_specific_009778 | 1.122                      | 0.736                      |                               |
| AN_specific_010261 | 1.062                      | 1.913                      |                               |
| AN_specific_010839 | 1.062                      | 1.781                      |                               |
| AN_specific_002624 | 1.051                      | 1.523                      |                               |
| AN_specific_006767 | 0.326                      | 3.180                      |                               |
| AN_specific_005745 | 1.291                      | 1.644                      |                               |
| AN_specific_009382 | 0.580                      | 0.943                      |                               |
| AN_specific_010004 | 2.526                      | 1.109                      |                               |
| AN_specific_010047 | 0.639                      | 0.393                      |                               |
| AN_specific_009775 | 1.178                      | 1.308                      |                               |
| AN_specific_009667 | 2.053                      | 1.419                      |                               |

|                    |       |       |  |
|--------------------|-------|-------|--|
| AN_specific_006844 | 1.154 | 3.695 |  |
| AN_specific_006767 | 2.081 | 0.669 |  |
| AN_specific_002086 | 0.618 | 0.728 |  |
| AN_specific_009974 | 0.377 | 0.045 |  |
| AN_specific_005745 | 0.580 | 0.943 |  |
| AN_specific_010004 | 2.081 | 0.669 |  |
| AN_specific_002086 | 0.618 | 0.728 |  |
| AN_specific_009974 | 0.159 | 0.944 |  |
| AN_specific_008150 | 1.062 | 1.781 |  |
| AN_specific_010839 | 0.685 | 1.651 |  |
| AN_specific_006000 | 0.606 | 0.285 |  |
| AN_specific_001554 | 1.178 | 1.308 |  |
| AN_specific_009667 | 1.154 | 3.695 |  |
| AN_specific_008579 | 2.749 | 3.563 |  |
| AN_specific_010478 | 2.001 | 2.083 |  |
| AN_specific_003520 | 1.792 | 1.957 |  |
| AN_specific_010261 | 1.062 | 1.913 |  |
| AN_specific_010839 | 1.062 | 1.781 |  |
| AN_specific_006000 | 0.685 | 1.651 |  |
| AN_specific_009382 | 1.291 | 1.644 |  |
| AN_specific_002584 | 1.385 | 1.582 |  |
| AN_specific_002624 | 1.051 | 1.523 |  |
| AN_specific_006411 | 0.829 | 1.474 |  |
| AN_specific_009667 | 1.178 | 1.308 |  |
| AN_specific_001499 | 0.782 | 1.206 |  |
| AN_specific_003308 | 0.608 | 1.179 |  |
| AN_specific_009669 | 0.960 | 1.086 |  |
| AN_specific_003285 | 0.735 | 1.063 |  |
| AN_specific_011044 | 0.963 | 1.037 |  |

## 19. Threonine.

| Gene ID            | Expression ratio<br>(MZnO) | Expression ratio<br>(NZnO) | Presumed function  |
|--------------------|----------------------------|----------------------------|--------------------|
| AN_specific_009572 | 7.322                      | 7.183                      | Threonine activity |
| AN_specific_002803 | 5.829                      | 4.870                      |                    |
| AN_specific_003204 | 2.850                      | 1.005                      |                    |
| AN_specific_004869 | 2.639                      | 3.142                      |                    |
| AN_specific_010047 | 2.526                      | 1.109                      |                    |
| AN_specific_003492 | 2.469                      | 3.345                      |                    |
| AN_specific_002717 | 2.457                      | 2.817                      |                    |
| AN_specific_005243 | 2.150                      | 0.331                      |                    |
| AN_specific_005503 | 2.089                      | 2.017                      |                    |
| AN_specific_006933 | 2.022                      | 1.550                      |                    |
| AN_specific_005438 | 1.843                      | 2.190                      |                    |
| AN_specific_010300 | 1.774                      | 1.757                      |                    |
| AN_specific_005969 | 1.761                      | 0.971                      |                    |
| AN_specific_009908 | 1.738                      | 0.840                      |                    |
| AN_specific_001949 | 1.728                      | 1.807                      |                    |
| AN_specific_011021 | 1.688                      | 1.968                      |                    |
| AN_specific_010581 | 1.684                      | 1.896                      |                    |
| AN_specific_003176 | 1.646                      | 2.607                      |                    |
| AN_specific_003475 | 1.615                      | 1.756                      |                    |
| AN_specific_009660 | 1.613                      | 1.599                      |                    |
| AN_specific_007119 | 4.922                      | 5.376                      |                    |
| AN_specific_000318 | 0.403                      | 0.615                      |                    |
| AN_specific_009436 | 0.334                      | 2.713                      |                    |
| AN_specific_001269 | 0.536                      | 0.445                      |                    |
| AN_specific_002992 | 1.292                      | 2.539                      |                    |
| AN_specific_010000 | 1.605                      | 2.177                      |                    |
| AN_specific_008938 | 1.023                      | 2.177                      |                    |
| AN_specific_010845 | 1.401                      | 2.036                      |                    |
| AN_specific_008212 | 1.131                      | 1.923                      |                    |
| AN_specific_010261 | 1.062                      | 1.913                      |                    |

|                    |       |       |  |
|--------------------|-------|-------|--|
| AN_specific_010581 | 1.684 | 1.896 |  |
| AN_specific_004596 | 1.259 | 1.861 |  |
| AN_specific_001949 | 1.728 | 1.807 |  |
| AN_specific_009350 | 0.769 | 1.785 |  |
| AN_specific_010839 | 1.062 | 1.781 |  |
| AN_specific_009688 | 1.290 | 1.759 |  |
| AN_specific_003475 | 1.615 | 1.756 |  |
| AN_specific_004850 | 0.426 | 1.725 |  |
| AN_specific_002542 | 1.043 | 1.718 |  |
| AN_specific_010052 | 1.309 | 1.686 |  |
| AN_specific_009660 | 1.613 | 1.599 |  |
| AN_specific_005504 | 1.358 | 1.590 |  |
| AN_specific_010482 | 0.771 | 1.543 |  |
| AN_specific_009493 | 1.569 | 1.535 |  |
| AN_specific_004173 | 1.423 | 1.490 |  |
| AN_specific_004554 | 0.823 | 1.432 |  |
| AN_specific_005286 | 0.941 | 1.411 |  |
| AN_specific_005121 | 1.332 | 1.357 |  |
| AN_specific_005640 | 0.880 | 1.342 |  |
| AN_specific_004951 | 1.439 | 1.339 |  |
| AN_specific_010773 | 0.779 | 1.334 |  |
| AN_specific_009667 | 1.178 | 1.308 |  |
| AN_specific_000122 | 0.942 | 1.301 |  |
| AN_specific_002957 | 0.630 | 1.251 |  |
| AN_specific_001499 | 0.782 | 1.206 |  |
| AN_specific_006478 | 1.234 | 1.205 |  |
| AN_specific_009696 | 0.641 | 1.186 |  |
| AN_specific_002185 | 0.979 | 1.141 |  |
| AN_specific_003285 | 0.735 | 1.063 |  |
| AN_specific_003585 | 0.387 | 1.010 |  |
| AN_specific_009762 | 0.138 | 1.008 |  |



## 20. Tryptophan metabolism.

| Gene ID            | Expression ratio<br>(MZnO) | Expression ratio<br>(NZnO) | Presumed function        |
|--------------------|----------------------------|----------------------------|--------------------------|
| AN_specific_005733 | 9.371                      | 8.750                      | Tryptophan<br>metabolism |
| AN_specific_009648 | 3.689                      | 0.184                      |                          |
| AN_specific_008950 | 2.400                      | 3.630                      |                          |
| AN_specific_001565 | 2.254                      | 3.158                      |                          |
| AN_specific_009751 | 2.102                      | 2.700                      |                          |
| AN_specific_007571 | 2.008                      | 1.228                      |                          |
| AN_specific_009994 | 1.953                      | 3.088                      |                          |
| AN_specific_002852 | 1.628                      | 2.639                      |                          |
| AN_specific_009807 | 1.574                      | 2.998                      |                          |
| AN_specific_009992 | 1.450                      | 1.305                      |                          |
| AN_specific_010448 | 1.274                      | 0.769                      |                          |
| AN_specific_007934 | 1.075                      | 1.403                      |                          |
| AN_specific_010333 | 0.949                      | 1.621                      |                          |
| AN_specific_010448 | 1.274                      | 0.769                      |                          |
| AN_specific_009751 | 2.102                      | 2.700                      |                          |
| AN_specific_009648 | 3.689                      | 0.184                      |                          |
| AN_specific_005733 | 9.371                      | 8.750                      |                          |
| AN_specific_003271 | 0.052                      | 0.605                      |                          |
| AN_specific_006347 | 4.133                      | 4.183                      |                          |
| AN_specific_001565 | 2.254                      | 3.158                      |                          |
| AN_specific_009994 | 1.953                      | 3.088                      |                          |
| AN_specific_009807 | 1.574                      | 2.998                      |                          |
| AN_specific_001919 | 0.870                      | 1.892                      |                          |
| AN_specific_003588 | 0.960                      | 1.416                      |                          |
| AN_specific_010220 | 0.774                      | 1.255                      |                          |
| AN_specific_005748 | 0.440                      | 1.185                      |                          |

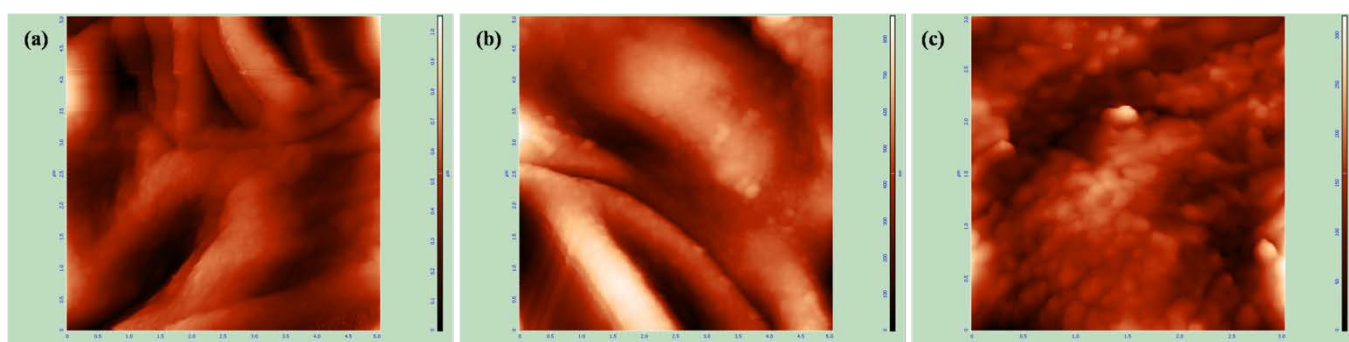

**Supporting Figure S10.** AFM study of Fungal hypha (*A. niger*, MTCC 10180): (a) Control (b) 250 ppm ZNPs treated (c) 500 ppm ZNPs treated.

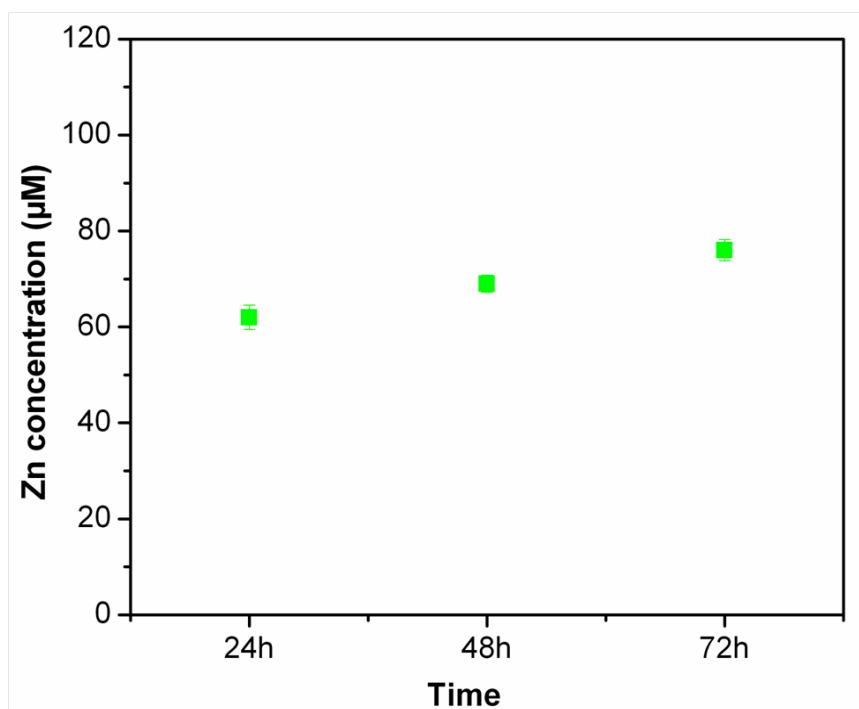

**Supporting Figure S11.**  $\text{Zn}^{2+}$  release from microwave synthesized ZNPs by ICPMS analysis at three different interval of times 24h, 48h and 72h respectively. A small amount of  $\text{Zn}^{2+}$  was released from ZNPs at the pH of fungal culture medium which could simultaneously contribute to the fungitoxic effect of ZNPs.

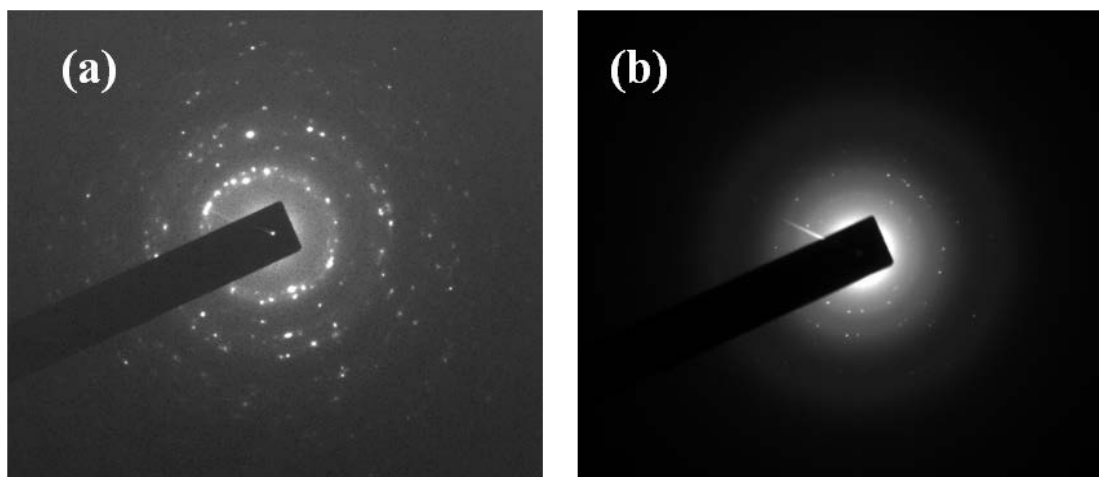

**Supporting Figure S12.** Selected area diffraction pattern (SAED) of (a) ZNPs and (b) ZNPs after internalization on fungal hyphae. The first one i.e. native ZNPs exhibited distinct crystalline structure but after internalization on to fungal hyphae its crystalline pattern was partially lost but still present.

**Table 2:** Comparative study of mice blood biochemical parameters of ZNPS treated mice at different doses compare to control in acute oral toxicity assay.

| Parameters                         |                                 | Control         | ZNPs        |             |               |
|------------------------------------|---------------------------------|-----------------|-------------|-------------|---------------|
|                                    |                                 |                 | 0.5 g/ kg   | 1 g/ kg     | 2g/ kg        |
| Hemoglobin (g/dl)                  |                                 | 12.1±0.36056    | 13±0.2      | 12.67±0.12  | 13.2±0.62     |
| TC                                 | RBC (million/ mm <sup>3</sup> ) | 4.1± 0.2        | 2.67±0.12   | 4.23±0.12   | 4.5±0.2       |
|                                    | WBC/ mm <sup>3</sup>            | 5658.33±62.9153 | 5790±36.05  | 5770±36.06  | 5686.67±80.83 |
| DC (%)                             | Neutrophils                     | 40±2            | 36±1        | 41±1.73     | 40±2          |
|                                    | Lymphocytes                     | 56.6667±3.51188 | 59±1        | 57±1        | 70±1          |
|                                    | Monocytes                       | 1.66667±0.57735 | 1±0         | 1.67±0.58   | 1.33±0.58     |
|                                    | Eosinophils                     | 2.66667±0.57735 | 2.33±0.58   | 2±0         | 2.67±0.58     |
|                                    | Basophils                       | 0±0             | 0±0         | 0±0         | 0±0           |
| Platelets (lakh/ mm <sup>3</sup> ) |                                 | 1.51±0.03606    | 1.5±0.02    | 1.53±0.01   | 1.52±0.06     |
| LDH (IU/L)                         |                                 | 240±2           | 237±3.06    | 243.33±1.15 | 239.33±1.53   |
| Creatinine (mg/dL)                 |                                 | 0.73±0.02       | 0.73±0.02   | 0.74±0.02   | 0.78±0.02     |
| Alkaline Phosphate (U/L)           |                                 | 60±2            | 57±1        | 57±1.73     | 58.67±2.52    |
| Total Protein (gm/dL)              |                                 | 6.1±0.1         | 6.03±0.058  | 6.17±0.15   | 6.2±0.26      |
| Cholesterol (mg/dL)                |                                 | 136±2           | 133.67±1.53 | 134.33±3.06 | 140.67±3.06   |
| Triglyceride (mg/dL)               |                                 | 70.3333±0.57735 | 71±1        | 70.67±2.52  | 71.67±1.53    |
| Uric Acid (mg/dL)                  |                                 | 2.8±0.1         | 2.67±0.15   | 2.9±0.1     | 3.07±0.153    |
| BUN (mg/dL)                        |                                 | 11±1            | 11±1        | 11±1        | 12.33±0.58    |
| S.G.O.T. (IU/L)                    |                                 | 12±1            | 12±1        | 12±1        | 13±1          |
| S.G.P.T. (IU/L)                    |                                 | 11±1            | 11.67±0.58  | 12.33±1.53  | 10±1          |
| Phosphorous (mg/dL)                |                                 | 2.9±0.1         | 2.73±0.15   | 2.63±0.15   | 3.03±0.153    |

**Table 3.** Comparison of blood biochemical parameters between control and ZNPs treated mice by i.v. injection.

| Parameters                         |                                    | Control       | ZNPs         |               |              |
|------------------------------------|------------------------------------|---------------|--------------|---------------|--------------|
|                                    |                                    |               | 100 µg/mL    | 250 µg/mL     | 500 µg/mL    |
| Haemoglobin (g/dL)                 |                                    | 13.15 ± 0.1   | 13.2 ± 0.15  | 13.25 ± 0.058 | 13.4 ± 0.26  |
| TC                                 | RBC (million/<br>mm <sup>3</sup> ) | 4.2 ± 0.1     | 4.2 ± 0.208  | 4.25 ± 0.15   | 4.35 ± 0.25  |
|                                    | WBC/ mm <sup>3</sup>               | 5785 ± 37.86  | 5860 ± 75    | 5825 ± 36.05  | 5835 ± 25.17 |
| DC (%)                             | Neutrophils                        | 41.5 ± 1.53   | 40 ± 2       | 41 ± 1        | 42.5 ± 1     |
|                                    | Lymphocytes                        | 66.5 ± 1.53   | 68.5 ± 1.53  | 68.5 ± 1      | 70 ± 1.15    |
|                                    | Monocytes                          | 2.5 ± 0.58    | 2.5 ± 0.58   | 3 ± 0.58      | 2.5 ± 0.58   |
|                                    | Eosinophils                        | 2.5 ± 0.58    | 2 ± 0.58     | 2.5 ± 0.58    | 2.5 ± 0.58   |
|                                    | Basophils                          | 0 ± 0         | 0 ± 0        | 0 ± 0         | 0 ± 0        |
| Platelets (lakh/ mm <sup>3</sup> ) |                                    | 1.6 ± 0.1     | 1.85 ± 0.15  | 1.9 ± 0.058   | 1.85 ± 0.1   |
| LDH (IU/L)                         |                                    | 240 ± 2.08    | 250 ± 1.53   | 254.5 ± 0.58  | 258.5 ± 1.53 |
| Creatinine (mg/dL)                 |                                    | 0.785 ± 0.015 | 0.785 ± 0.01 | 0.79 ± 0.01   | 0.79 ± 0.01  |
| Alkaline Phosphate (IU/L)          |                                    | 59.5 ± 1.53   | 64.5 ± 1.53  | 65 ± 1.53     | 69±1         |
| Total Protein (gm/dL)              |                                    | 6.95 ± 0.1    | 7.1 ± 0.15   | 7 ± 0.1       | 7.05 ± 0.21  |
| Cholesterol (mg/dL)                |                                    | 138.5 ± 1     | 138.5 ± 1.53 | 141.5 ± 1     | 140.5 ± 1    |
| Triglyceride (mg/dL)               |                                    | 73.5 ± 1.53   | 68.5 ± 1.53  | 69 ± 1        | 70 ± 1       |
| Uric Acid (mg/dL)                  |                                    | 3.05 ± 0.058  | 3.05 ± 0.1   | 2.95 ± 0.058  | 2.95 ± 0.1   |
| BUN (mg/dL)                        |                                    | 11 ± 0.58     | 12.5 ± 1     | 13 ± 1        | 13.5 ± 0.58  |
| SGOT (IU/L)                        |                                    | 13 ± 0.58     | 15.5 ± 1.52  | 17.5 ± 0.58   | 19 ± 1       |
| SGPT (IU/L)                        |                                    | 11.5 ± 1      | 13 ± 0       | 12.5 ± 0.58   | 12.5 ± 0.58  |
| Phosphorous (mg/dL)                |                                    | 3 ± 0.15      | 3.25 ± 0.15  | 3.25 ± 0.15   | 3.3 ± 0.1    |

**Table 4.** Comparison of blood biochemical parameters between control and MZnO treated mice by i.v. injection.

| Parameters                         |                                    | Control       | MZnO             |                   |                    |
|------------------------------------|------------------------------------|---------------|------------------|-------------------|--------------------|
|                                    |                                    |               | 100 µg/mL        | 250 µg/mL         | 500 µg/mL          |
| Haemoglobin (g/dL)                 |                                    | 13.15 ± 0.1   | 13.33 ± 0.15     | 13.3 ± 0.35       | 13.6 ± 0.26        |
| TC                                 | RBC (million/<br>mm <sup>3</sup> ) | 4.2 ± 0.1     | 4.46 ± 0.15      | 4.53 ± 0.15       | 4.7 ± 0.2          |
|                                    | WBC/ mm <sup>3</sup>               | 5785 ± 37.86  | 5870 ± 26.46     | 5776.66±<br>32.15 | 5776.67 ±<br>25.17 |
| DC (%)                             | Neutrophils                        | 41.5 ± 1.53   | 39.33 ± 2.08     | 39.67 ± 1.58      | 40 ± 2.08          |
|                                    | Lymphocytes                        | 66.5 ± 1.53   | 67.33 ± 2.08     | 70.5 ± 2.08       | 68.33 ± 2.08       |
|                                    | Monocytes                          | 2.5 ± 0.58    | 2.33 ± 0.58      | 3 ± 0.58          | 2.33 ± 0.58        |
|                                    | Eosinophils                        | 2.5 ± 0.58    | 2.33 ± 0.58      | 2 ± 0.58          | 2.33 ± 0.58        |
|                                    | Basophils                          | 0±0           | 0±0              | 0±0               | 0±0                |
| Platelets (lakh/ mm <sup>3</sup> ) |                                    | 1.6 ± 0.1     | 1.67 ± 0.058     | 1.7 ± 0.21        | 1.73 ± 0.058       |
| LDH (IU/L)                         |                                    | 240 ± 2.08    | 252.33 ±<br>2.51 | 249 ± 1.15        | 257.33 ± 2.52      |
| Creatinine (mg/dL)                 |                                    | 0.785 ± 0.015 | 0.77 ± 0.02      | 0.765 ± 0.01      | 0.77 ± 0.021       |
| Alkaline Phosphate (IU/L)          |                                    | 59.5 ± 1.53   | 70.33 ± 1.53     | 68.67 ± 2.08      | 72.5 ± 1.52        |
| Total Protein (gm/dL)              |                                    | 6.95 ± 0.1    | 6.7 ± 0.265      | 6.85 ± 0.15       | 7.1 ± 0.1          |
| Cholesterol (mg/dL)                |                                    | 138.5 ± 1     | 139 ± 2          | 137.5 ± 2.64      | 138.67 ± 1.58      |
| Triglyceride (mg/dL)               |                                    | 73.5 ± 1.53   | 73.33 ± 1.52     | 70.5 ± 1          | 69.67 ± 2.52       |
| Uric Acid (mg/dL)                  |                                    | 3.05 ± 0.058  | 2.93 ± 0.115     | 3.05 ± 0.1        | 3 ± 0.2            |
| BUN (mg/dL)                        |                                    | 11 ± 0.58     | 11.33 ± 0.58     | 12.5 ± 0.58       | 12.67 ± 0.58       |
| SGOT (IU/L)                        |                                    | 13 ± 0.58     | 16.67 ± 1.15     | 16.5 ± 0.58       | 18.33 ± 0.58       |
| SGPT (IU/L)                        |                                    | 11.5 ± 1      | 12.5 ± 1.53      | 12.67 ± 1.52      | 13 ± 1             |
| Phosphorous (mg/dL)                |                                    | 3 ± 0.15      | 3.17 ± 0.15      | 3.26 ± 0.15       | 3.35 ± 0.1         |

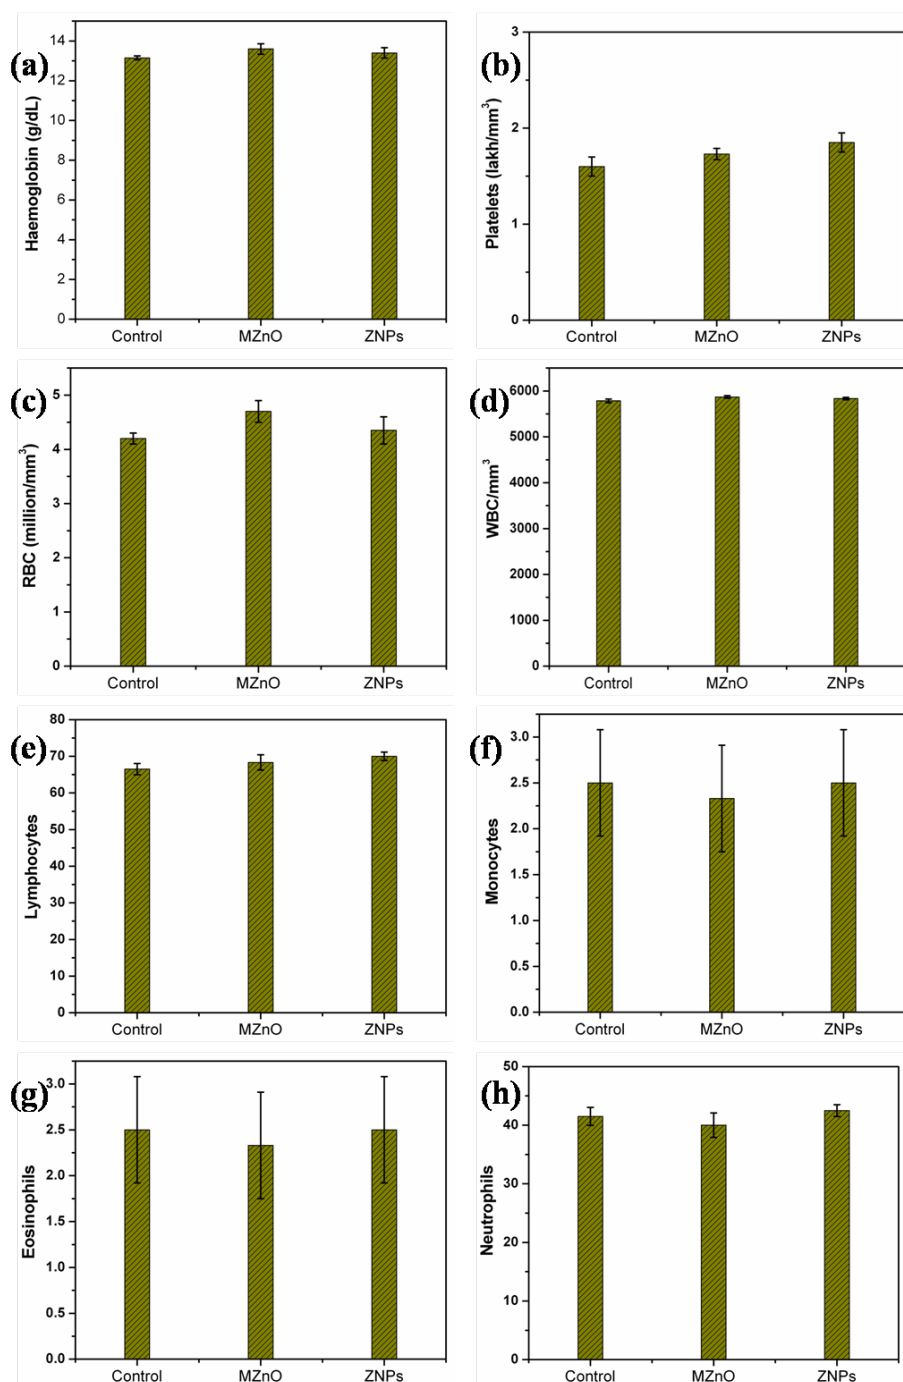

**Figure S13A.** Diagrammatic representation of relative hematology indicators such as (a) Haemoglobin, (b) Platelets count, (c) Red blood cell count (RBC), (d) White blood cell count (WBC), (e) Lymphocytes, (f) Monocytes, (g) Eosinophils and (h) Neutrophils of Control samples, MZnO treated mice at maximum concentration after 2 months (intravenous injection) and ZNPs treated mice at maximum concentration after 2 months (intravenous injection). Systematic toxicity study on hematology parameters suggested that no significant toxicity or any significant changes were observed in post intravenous injected mice, therefore MZnO and ZNPs both were biocompatible in nature.



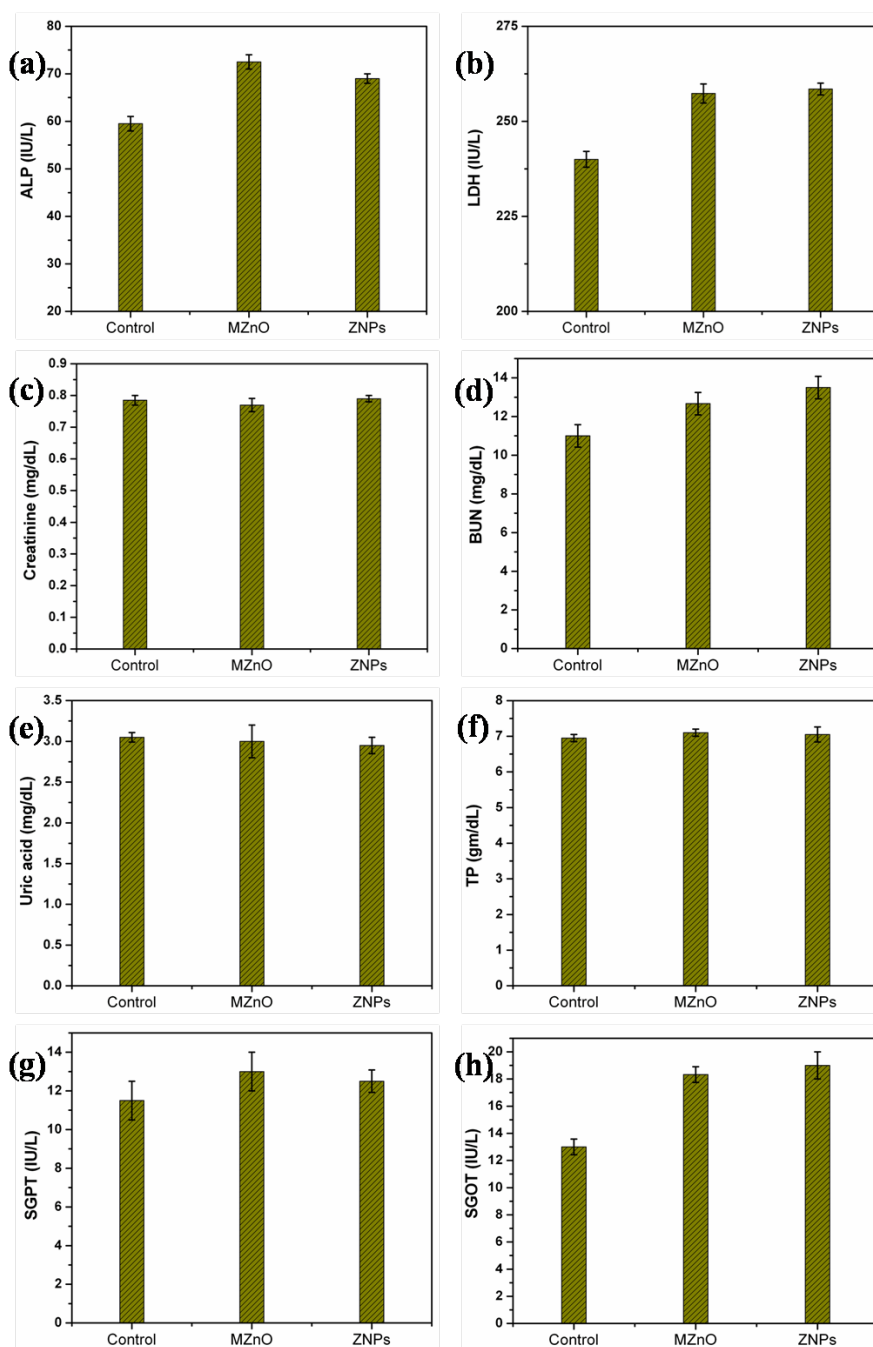

**Figure S13B.** Diagrammatic representation of relative serum biochemical indicators such as (a) Alkaline phosphatase (ALP), (b) Lactate dehydrogenase (LDH), (c) Creatinine, (d) Blood urea nitrogen (BUN), (e) Uric acid, (f) Total protein (TP), (g) Serum glutamic pyruvic transaminase (SGPT) and (h) Serum glutamic oxaloacetic acid (SGOT) of Control samples, MZnO treated mice at maximum concentration after 2 months (intravenous injection) and ZNPs treated mice at maximum concentration after 2 months (intravenous injection). Systematic toxicity study on serum biochemical parameters suggested that no significant toxicity or any significant changes were observed in post intravenous injected mice (for both MZnO and ZNPs). Only minor alterations were observed in SGOT, LDH and ALP levels.

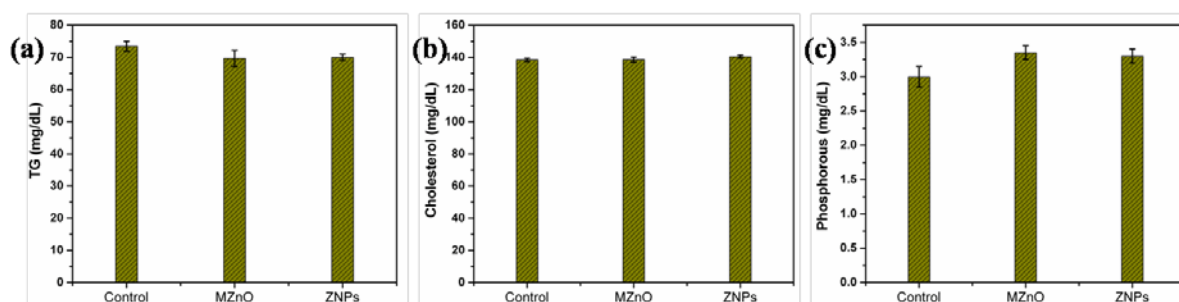

**Figure S13C.** Diagrammatic representation of other biochemical parameters such as (a) Triglyceride (TG), (b) Cholesterol and (c) Phosphorus of Control samples, MZnO treated mice at maximum concentration after 2 months (intravenous injection) and ZNPs treated mice at maximum concentration after 2 months (intravenous injection). No significant toxicity was observed in all the above cases for MZnO and ZNPs treatment by intravenous injection pathway during evaluation of long term toxicity (for 2 months). Therefore oral administration route as well as intravenous injection route justified biocompatibility of ZNPs.

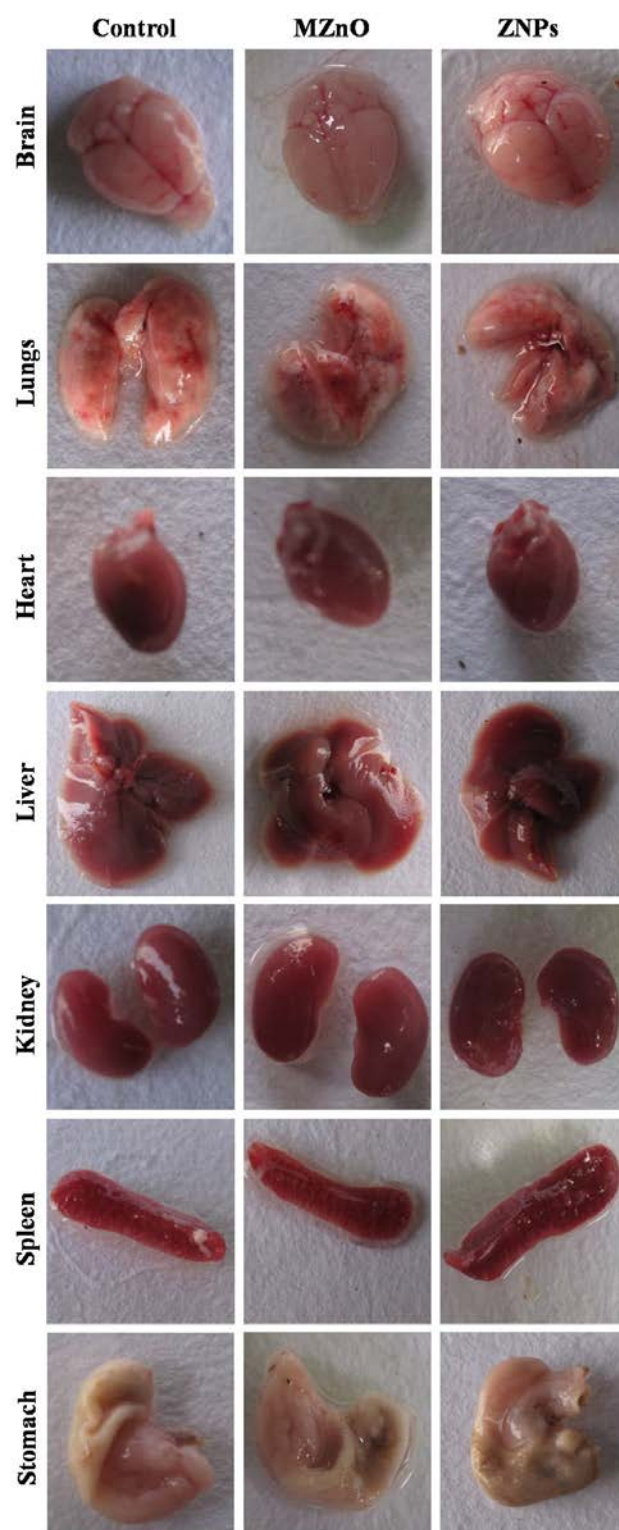

**Supporting Figure S14.** Major organs such as brain, lung, heart, liver, kidney, spleen and stomach of Control mice (left panel), MZnO (500  $\mu\text{g/mL}$ ) intravenously injected mice after 2 months (middle panel) and ZNPs (500  $\mu\text{g/mL}$ ) intravenously injected mice after 2 months (right panel). So significant alteration in the organs were was observed after intravenous injection of MZnO and ZNPs.

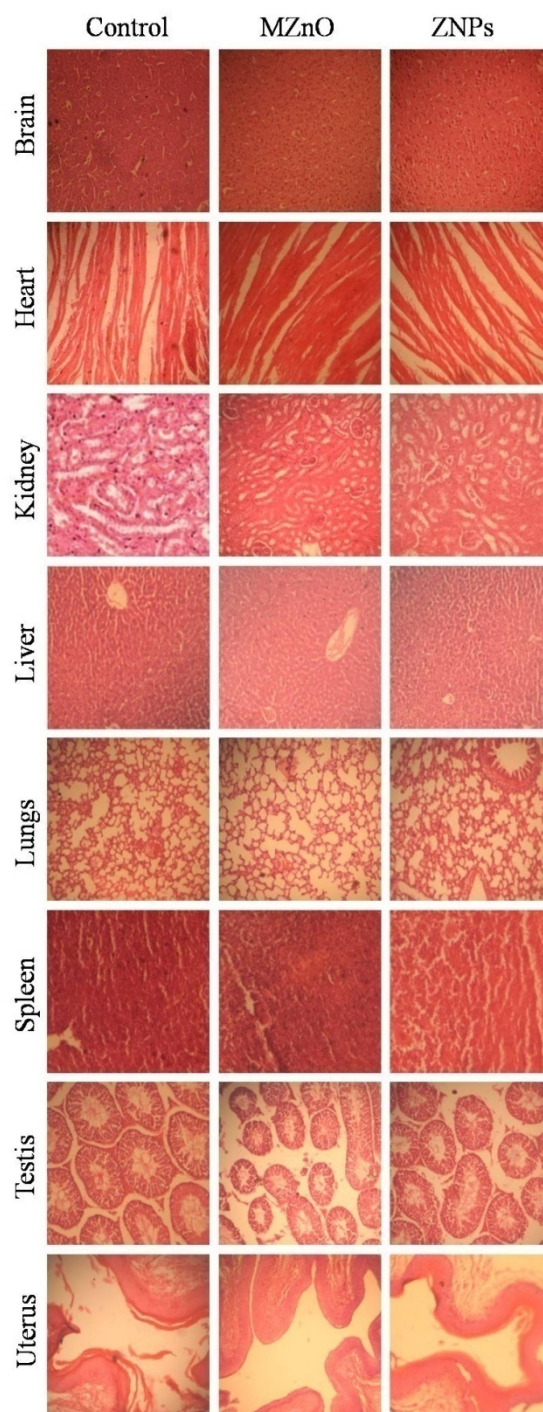

**Supporting Figure S15.** Histopathological analysis of major organs such as brain, heart, kidney, liver, lung, spleen, testis and uterus of Control mice (left panel), MZnO (500  $\mu\text{g/mL}$ ) intravenously injected mice after 2 months (middle panel) and ZNPs (500  $\mu\text{g/mL}$ ) intravenously injected mice after 2 months (right panel). No significant difference between control and treated mice was observed, only minor alteration was observed in liver and kidney due to ROS generation by MZnO and ZNPs. All other organs were unaltered after treatment with respect to control. Only the histopathological analysis at maximum concentration of MZnO and ZNPs were shown here.

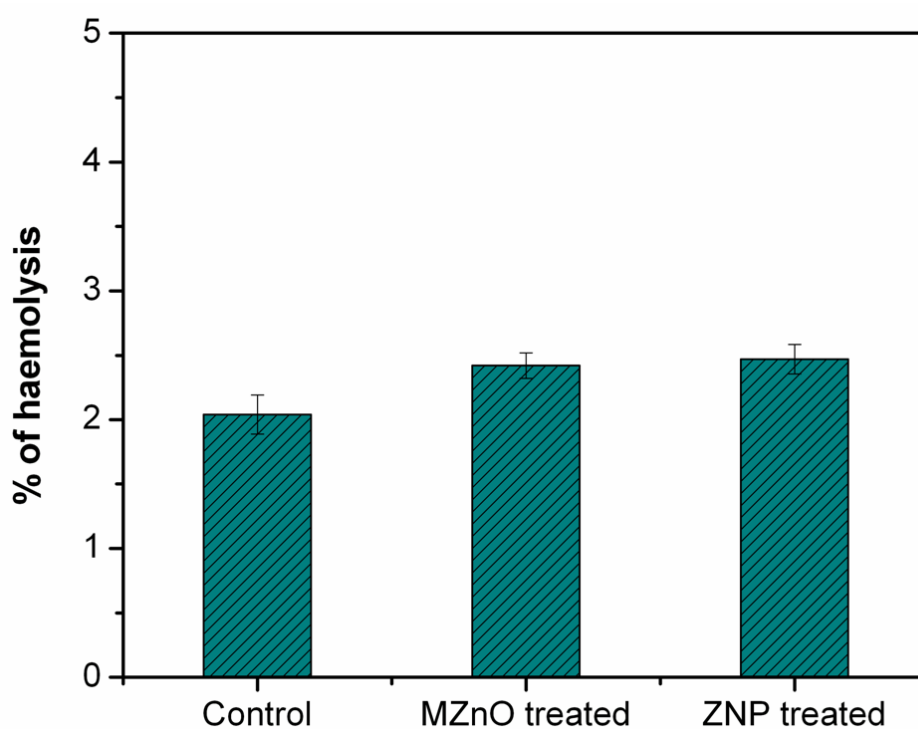

**Supporting Figure S16.** *In vivo* haemolysis experiment on mice model. Maximum concentration used for long term toxicity determination was used for this haemolysis experiment. The mice were intravenous injected with 100 $\mu$ L MZnO and ZNPs of concentration 500  $\mu$ g/mL through tail vein. After 1h of injection the blood was isolated and haemolysis measurement was carried out (as mentioned above). Interestingly no significant haemolysis was observed after intravenous injection; only 2.40% and 2.47% haemolysis was observed in MZnO and ZNPs treated mice while the control mice showed ~2% of haemolysis. Therefore no significant toxicity was observed in MZnO and ZNPs treated mice in blood stream.

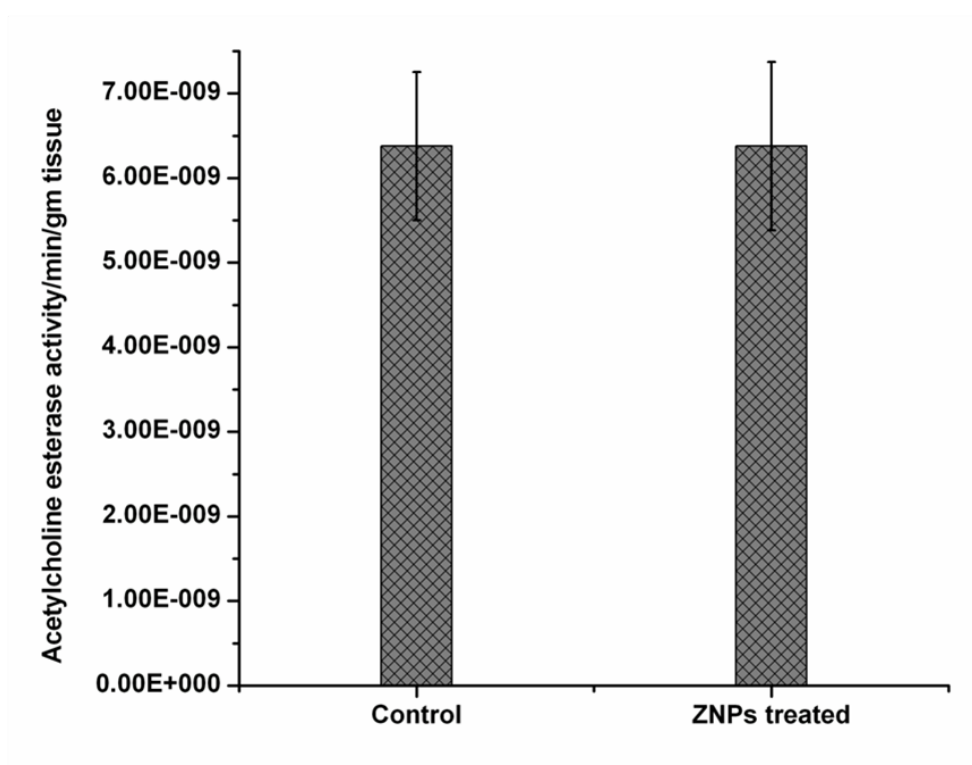

**Supporting Figure S17.** Comparative acetylcholine esterase activity study of mice brain [control and ZNPs treated (2g/kg)].
